# Supplementary material
Source: PubMed Central journal article supplement (PMC4655599)
Supplement: NIHMS734288-supplement.pdf [file NIHMS734288-supplement.pdf]

# Angina Does Not Identify Patients With Coronary Disease, Heart Failure, and a Reduced Left Ventricular Ejection Fraction Who Have Greater Prognostic Benefit From Surgical Revascularization: Insights From the STICH Trial

**Brief title:** The STICH Angina Analysis

E. Marc Jolicœur, MD, MSc, MHS,\* Allison Dunning, MS† Serenella Castelveccchio, MD,‡ Rafal Dabrowski, MD, PhD,§ Myron A. Waclawiw, PhD,|| Mark C. Petrie, MD,¶ Ralph Stewart, MB, ChB,# Pardeep S. Jhund, MB, ChB, PhD,\*\* Patrice Desvigne-Nickens, MD,||| Julio A. Panza, MD,†† Robert O. Bonow, MD,‡‡ Benjamin Sun, MD,§§ Tan Ru San, MD,||| Hussein R. Al-Khalidi, PhD,† Jean L. Rouleau, MD,\* Eric J. Velazquez, MD,† John G.F. Cleland, MD, PhD¶¶

**From the:** \*Department of Medicine, Montreal Heart Institute, Université de Montréal, Canada †Duke Clinical Research Institute, Duke University School of Medicine, Durham, North Carolina; ‡IRCCS Policlinico San Donato, Milan, Italy; §National Institute of Cardiology, Warsaw, Poland; || NIH/NHLBI, Bethesda, Maryland; ¶Golden Jubilee National Hospital, Glasgow, United Kingdom; #Auckland City Hospital, Auckland, New Zealand; \*\* BHF Cardiovascular Research Centre, University of Glasgow, Glasgow, United Kingdom; ††Westchester Medical Center and New York Medical College, Valhalla, New York; ‡‡Northwestern University Feinberg School of Medicine, Chicago, Illinois; §§Allina – Minneapolis, Minnesota; ||| National Heart Centre – Singapore, Singapore; ¶¶ National Heart & Lung Institute, Royal Brompton & Harefield Hospitals, Imperial College, London, United Kingdom

**Disclosures:** The authors have reported that they have no relationships relevant to the contents of this paper to disclose.

**Funding:** This work was supported by grants U01HL69015 and U01HL69013 from the National Heart, Lung and Blood Institute, National Institutes of Health, Bethesda, Maryland. This work is solely the responsibility of the authors and does not necessarily represent the official views of the National Heart, Lung, and Blood Institute or National Institutes of Health. Dr. Jolicœur is supported by research grants from les Fonds la Recherche du Québec en santé (FRQS), the Canadian Institutes for Health Research (CIHR), and by la Fondation de l'Institut de Cardiologie de Montréal.

## <COR>Reprint requests and correspondence:

Dr. John GF Cleland  
National Heart & Lung Institute  
Royal Brompton & Harefield Hospitals  
Imperial College, London, UK  
Telephone: (44)(1482) 46 1776  
Fax: (44)(1482) 46 1779  
E-mail: [j.cleland@imperial.ac.uk](mailto:j.cleland@imperial.ac.uk)

## **ABSTRACT:**

**Background:** Patients with left ventricular (LV) systolic dysfunction, coronary artery disease (CAD), and angina are often thought to have a worse prognosis and a greater prognostic benefit from coronary artery bypass graft (CABG) surgery than those without angina.

**Objectives:** We investigated whether: 1) angina is associated with a worse prognosis; 2) angina identified patients who had a greater survival benefit from CABG; and 3) whether CABG improved angina in patients with LV systolic dysfunction and CAD.

**Methods:** We performed an analysis of the Surgical Treatment for Ischemic Heart Failure trial, in which 1,212 patients with an ejection fraction  $\leq 35\%$  and CAD were randomized to CABG or medical therapy. Multivariable Cox and logistic models were used to assess long-term clinical outcomes.

**Results:** At baseline, 770 patients (64%) reported angina. Amongst patients assigned to MED, all-cause mortality was similar in patients with and without angina (HR: 1.05; 95% CI: 0.79 to 1.38). The effect of CABG was similar whether the patient had angina (HR: 0.89; 95% CI: 0.71 to 1.13) or not (HR: 0.68; 95% CI: 0.50 to 0.94) (p interaction = 0.14). Patients assigned to CABG were more likely to report improvement in angina than those assigned to medical therapy alone (OR: 0.70; 95% CI: 0.55 to 0.90; p < 0.01).

**Conclusions:** Angina does not predict all-cause mortality in medically treated patients with LV systolic dysfunction and CAD, nor does it identify patients who have a greater survival benefit from CABG. However, CABG does improve angina to a greater extent than medical therapy alone.

(Comparison of Surgical and Medical Treatment for Congestive Heart Failure and Coronary Artery Disease [STICH]: NCT00023595)

**<KW>Key words:** Coronary Artery Bypass Grafting; Coronary Artery Disease; Heart Failure; Mortality

## **Abbreviations**

BMI = body mass index

CABG = coronary artery bypass graft

CAD = coronary artery disease

CCS = Canadian Cardiovascular Society

CI = confidence interval

HR = hazard ratio

IQR = interquartile range

LVEF = left ventricular ejection fraction

MI = myocardial infarction

OR = odds ratio

## **Introduction**

Coronary artery bypass grafting (CABG) is recommended in patients with angina (1), coronary artery disease (CAD), and left ventricular (LV) systolic dysfunction (2,3). However, compelling evidence that the presence or absence of angina should guide decisions about revascularization is lacking (4). Tests of myocardial viability or stress-induced ischemia have failed, so far, to identify a subset of patients with heart failure who have more to gain from CABG compared to medical therapy alone in randomized controlled trials (5,6).

Clinical guidelines identify angina as an important consideration when deciding whether patients with heart failure and reduced LV function should have CABG (7). Angina pectoris signals the presence of viable myocardium that is prone to ischemia and at risk of infarction, and may therefore confer an adverse outcome (8). Patients with heart failure and CAD who do not have angina might have less jeopardized myocardium at risk of ischemia, indicating a better prognosis, or have cardiac denervation rendering myocardial ischemia silent, or a substantial volume of myocardium affected by hibernation or replaced by scar, which could signal an adverse prognosis (9,10). Surprisingly, information on the prognostic significance of angina in patients with heart failure who are known to have CAD has not been reported. Accordingly, we conducted an analysis of the Surgical Treatment for Ischemic Heart Failure (STICH) trial data to address 3 questions: 1) Does the presence of angina influence outcomes in patients with heart failure and CAD managed without resort to revascularization? 2) Does angina identify patients who will experience a greater survival benefit from CABG? 3) Does CABG improve angina in this population?

## **Methods**

### *Study population*

The rationale and design of the STICH trial were published previously (11). STICH was a prospective, multicenter, randomized trial sponsored by the National Heart, Lung and Blood Institute (NHLBI) that recruited patients with CAD and an LV ejection fraction of 35% or less between 2002 and 2007 (NCT00023595) (4). For the present study, 1,212 participants enrolled in the surgical revascularization hypothesis were included. This part of the STICH trial assessed whether CABG combined with optimal medical therapy improved survival compared with optimal medical therapy alone. The inclusion and exclusion criteria and the requirements for ensuring high-quality surgical revascularization have been described (12). The NHLBI and the ethics committee at each recruiting institution approved the study protocol. All patients provided written informed consent. All authors have read and agreed to the paper as written.

### *Study outcomes*

A blinded clinical events committee adjudicated all deaths using pre-specified criteria (4,11). Angina status was assessed using the Canadian Cardiovascular Society (CCS) classification at baseline and at each follow-up visit. Angina relief was primarily defined as an improvement of  $\geq 1$  CCS angina class.

### *Statistical analysis*

Continuous variables are presented using the median (interquartile range) and compared using Wilcoxon rank-sum tests. Discrete variables are presented as counts (percentages), and compared using either Pearson's chi-square or the Fisher exact test, as appropriate. For time-to-event analysis, Kaplan–Meier survival estimates were used to estimate event rates over the long-term follow-up for patients who did and did not receive CABG surgery (13). Statistical



significance was determined at the 2-sided  $\alpha = 0.05$  level. No adjustments were made for multiple comparisons, as this analysis should be considered exploratory, rather than definitive. Data analyses were performed with SAS software package (version 9.4, SAS Institute, Cary, North Carolina).

### *Modeling of outcomes*

For each research question, a multivariable model was developed to adjust for known or expected confounding variables. For each model, candidate variables were pre-specified, using either clinical experience or previously reported risk factors (4,5,14). The primary analysis was on the basis of the intention-to-treat principle. We repeated the analyses according to the treatments actually received (rather than assigned) to ascertain the influence of crossover outcomes.

The first analysis ascertained the relationship between angina and all-cause mortality (primary endpoint), and the composite of all-cause mortality or all-cause hospitalization (secondary endpoint) exclusively in patients assigned to medical therapy alone. The second analysis compared the effect of CABG versus medical therapy alone on all-cause mortality and the composite of all-cause mortality or hospitalization in patients with and without angina, and sought potential interactions between the presence of angina and randomly assigned group (see **Online Supplementary Methods**). For both analyses, adjustment for baseline risk factors was implemented by utilizing a multivariable Cox proportional hazards model to estimate the adjusted hazard ratio and its 95% confidence interval (CI) (15). In both models, the presence of angina was dichotomized as no angina (CCS = 0) versus angina (CCS = 1 or above). However, to assess the stability of our models across the spectrum of angina severity, we conducted alternate analyses after stratifying angina as absent (CCS = 0), mild (CCS = 1), and moderate or severe (CCS >1).

The third analysis investigated the relationship between randomization to CABG or medical therapy alone and the relief of angina. For the purpose of this analysis, we modeled a multivariable logistic regression in which the primary endpoint was defined as improvement of  $\geq 1$  CCS angina class from baseline to last available follow-up. The candidate independent predictors were identical to previous analyses, with the addition of change in beta-blocker and nitrate use from baseline and at follow-up. The robustness of the model was tested in a series of sensitivity analyses (see **Online Supplementary Methods**).

The authors reviewed the data, participated in the analyses, and wrote the manuscript, and assume responsibility for the completeness and accuracy of the data and the analyses, and for the fidelity of the study to the trial protocol.

## **Results**

### *Study population*

Of 1,212 patients enrolled, 770 patients (63.5%) reported angina at baseline (187 in CCS class I, 525 in CCS class II, and 58 in CCS class III/IV) and 442 patients (36.5%) reported having no angina. In each angina group, the proportion of patients assigned to CABG or medical therapy alone was similar (**Table 1**). Final follow-up status for all-cause mortality and all-cause hospitalization was ascertained for 1,207 patients (99.6%) over a median follow-up time of 56 months.

### *Baseline characteristics*

The baseline characteristics and the burden of CAD of patients who did or did not report angina were similar, with some exceptions. Patients of Caucasian origin reported less angina. Patients who reported angina were younger, were more likely to have experienced a previous myocardial infarction (MI) and to be treated with long-acting nitrates, but were less likely to

have a history of atrial fibrillation, renal dysfunction, diabetes mellitus, stroke, or hyperlipidemia (**Table 1**). There was no significant difference in angina status at baseline between treatment arms ( $p = 0.52$ ).

*Angina and outcomes in patients assigned to medical therapy alone*

Baseline characteristics of patients assigned to medical therapy alone with and without angina are compared in **Online Table 1**. Among patients assigned to medical therapy alone ( $n = 602$ ), the presence or absence of angina at baseline was not associated with all-cause mortality (HR: 1.05; 95% CI: 0.79 to 1.38;  $p = 0.74$ , for absence of angina) (**Figure 1**, and **Online Table 2A**). However, after stratification, moderate to severe angina ( $CCS \geq 2$ ) as compared with no angina was associated with all-cause mortality (HR: 1.27; 95% CI: 1.04 to 1.57;  $p = 0.02$ ) (**Online Table 2B**). Angina was not associated with a greater risk of the composite of all-cause mortality or hospitalization (HR: 1.05; 95% CI: 0.86 to 1.28;  $p = 0.64$ ).

*Influence of angina on the impact of CABG on all-cause death, hospitalizations, and cardiovascular endpoints*

In patients with angina, all-cause mortality was similar among patients assigned to CABG or medical therapy alone (37.4% vs. 39.5%; adjusted HR: 0.89; 95% CI: 0.71 to 1.13;  $p = 0.34$ ). In patients without angina, mortality was lower in patients assigned to CABG (32.7% vs. 42.7%; adjusted HR: 0.68; 95% CI: 0.50 to 0.94;  $p = 0.02$ ) (**Table 2**, **Figure 2**). However, the interaction between the presence of angina and the effect of CABG versus medical therapy on survival was not significant ( $p = 0.14$ ). The composite of all-cause mortality or hospitalizations was reduced to a similar extent in patients assigned to CABG, whether they had angina or not (HR: 0.78; 95% CI: 0.66 to 0.93, and HR: 0.80; 95% CI: 0.64 to 1.00, respectively) (**Table 2**).

Further stratifying patients according to severity of angina yielded similar results. Mortality rates in those assigned to CABG rather than to medical therapy alone, were similar for patients in CCS I (34.4% vs. 38.5%; HR: 0.83; 95% CI: 0.49 to 1.39;  $p = 0.47$ ) and CCS >1 (39.9% vs. 38.4%; HR: 0.94; 95% CI: 0.73 to 1.23;  $p = 0.66$ ) (**Online Table 3**). When crossovers from one treatment arm to another were considered, mortality was lower in patients with and without angina if they had CABG (HR: 0.67; 95% CI: 0.53 to 0.85, and HR: 0.63; 95% CI: 0.47 to 0.88, respectively) (**Online Figure 1, Online Table 4**). Data for other cardiovascular endpoints is presented in **Online Table 5**.

#### *Effect of CABG and medical therapy on relief of angina*

Eighty-five patients died in hospital after CABG or in the interval before the first follow-up outpatient visit at 4 months. Of the remaining 1,127 patients, an evaluation of angina was available in 1,089 (97%), with a median follow-up time of 52 months (**Online Figure 2**).

Of the 1,089 patients with information on angina available at follow-up, 494 (45.4%) reported an improvement in angina: 50% of those assigned to the CABG + medical therapy and 41% of those assigned to medical therapy alone. Patients reporting angina at baseline were less likely to have worsening CCS angina class if assigned to CABG rather than medical therapy alone (odds ratio: 0.70; 95% CI: 0.55 to 0.90;  $p < 0.01$ ). The positive association between CABG and relief of angina persisted in all sensitivity analyses (**Table 3**).

## **Discussion**

These analyses of the STICH trial are the first to investigate the impact of angina on outcomes in a randomized controlled study evaluating the benefits of CABG in patients with CAD, heart failure, and LV systolic dysfunction. Angina does not predict prognosis in medically treated patients with known CAD, nor does the presence or absence of angina identify patients

with LV dysfunction and CAD who have a greater benefit from CABG (**Central Illustration**). Although mortality was lower in patients assigned to CABG who did not have angina, the interaction between assigned treatment and angina at baseline was not significant. When crossovers were considered, the observed reduction in mortality with CABG was significant and of similar magnitude in patients with and without angina. Finally, as may be expected, CABG improves angina compared with medical therapy alone. These findings have important clinical implications, given the paucity of prior evidence to guide decision-making in patients with angina and LV systolic dysfunction.

Among patients with severe LV dysfunction, CABG is associated with an early risk of serious complications, including death (16). Findings from this study challenge the perceived benefit–risk balance for CABG in patients with and without angina. Although patients with heart failure and angina recalcitrant to pharmacological therapy should be considered for revascularization for symptom relief, this analysis suggests that insofar as subsequent prognosis is concerned, the presence or absence of angina should not be used as a discriminating factor to decide for or against revascularization as an initial treatment strategy. These findings conflict with the opinion expressed in several clinical practice guidelines, which infer that angina is both a marker of a poorer prognosis and of a greater likelihood of prognostic benefit from revascularization. The European Society of Cardiology recommends coronary revascularization when angina persists despite treatment with 2 anti-anginal drugs; revascularization is not recommended in patients without angina and viable myocardium (1,17). The American practice guidelines do not directly address the question of angina. Instead, the decision to proceed with either CABG or PCI in patients with CAD and LV systolic dysfunction should be on the basis of clinical judgment after a multidisciplinary consideration of the coronary anatomy (including

single vs. multiple coronary lesions), the presence of severe comorbid conditions, and the severity of LV systolic dysfunction (18,19).

By design, all patients in this study had CAD, which is well known to be associated with an adverse prognosis in patients with heart failure. Other analyses, in populations with less robust evidence of CAD, suggest that angina is associated with a worse outcome (14), but this may be because angina is a marker confirming the presence of CAD. The reasons why angina does not predict a mortality benefit from CABG are uncertain, and cannot be determined from the current study. Results of this analysis are consistent with previous findings from STICH and the Heart Failure Revascularization Trial (HEART) (20), suggesting that neither myocardial viability (5) nor reversible myocardial ischemia (6) helps predict which patients benefit from CABG.

There are no ongoing trials of CABG versus medical therapy in heart failure to confirm or refute our findings. The Study of Efficacy and Safety of Percutaneous Coronary Intervention to Improve Survival in Heart Failure (REVIVED-BCIS2) will address the effects of revascularization in heart failure, albeit by percutaneous coronary intervention (21), in patients with and without concomitant angina.

The findings of this analysis of the STICH trial should be applied to other types of patients with CAD with caution. CABG should be considered, whenever feasible, in patients with angina refractory to medical therapy, whether LV systolic function is reduced or not. However, the relationship between CAD, angina, and ischemic burden is complex, due, in part, to the great improvement in the contemporary medical therapy of heart failure and CAD. In the COURAGE (Clinical Outcomes Using Revascularization and Aggressive Drug Evaluation) (22), and BARI 2D (Bypass Angioplasty Revascularization Investigation 2 Diabetes) trials (23,24),

both of which included very few patients with LV systolic dysfunction, the ischemic burden failed to predict the effect of revascularization on clinical endpoints. However, regardless of the presence of angina or ischemic burden, the severity of CAD (25) and the extent of myocardial dysfunction and scar do appear to influence the benefits of CABG.

### **Limitations**

The present study is a retrospective analysis of a randomized trial, and unknown confounders and biases may have affected the complex relation between angina, CABG, and outcomes. To minimize this, we adjusted for key variables known to affect survival and performed sensitivity analyses. With few exceptions (20,26), there is no other prospective dataset besides the STICH trial, which assesses the effect of CABG on outcomes in patients with LV systolic dysfunction. This precludes any external validation of our findings with an independent trial population. Patients enrolled in the STICH trial were mostly men, white, and relatively young. Many patients and investigators may have elected to proceed to revascularization if the coronary anatomy was thought to be associated with a particularly adverse prognosis or was highly amenable to percutaneous coronary intervention, rather than enroll the patient in this study. This might be particularly true for patients with angina. For these reasons, extrapolation of our results to broader populations should be made with caution. The identification and classification of angina in patients enrolled in STICH was at the discretion of study-site investigators using established clinical guidelines. Even so, there may be local variability in the angina definitions employed; hence, our findings should be interpreted with caution in groups (women and older patients) (27) who present with atypical symptoms. Patients with markedly limiting angina (CCS class III or IV) were under-represented in the study. For this reason, it was

not possible to fully explore a dose-response effect across the complete spectrum of angina severity.

## **Conclusions**

Our study suggests that among patients with CAD, heart failure, and LV systolic dysfunction, the presence of angina does not confer a markedly worse prognosis or the potential for a greater benefit from revascularization by CABG. However, CABG does improve angina compared with medical therapy alone. These findings may influence clinical practice by diminishing the relevance of the role of angina for treatment decisions and prognostication in patients with ischemic cardiomyopathy.



## **PERSPECTIVES**

*Competency in Medical Knowledge:* The occurrence of angina pectoris is not a predictor or mortality in medically treated patients with coronary artery disease (CAD) and left ventricular (LV) systolic dysfunction. Bypass surgery (CABG) is more effective than medical therapy in relieving angina and lowers mortality to a similar extent in those with and without angina.

*Translational Outlook:* Additional studies are needed to clarify the mechanisms underlying the interaction between angina, revascularization and clinical cardiovascular outcomes.

## References

1. Authors/Task Force Members, McMurray JJ, Adamopoulos S, et al.; ESC Committee for Practice Guidelines (CPG), Document Reviewers. ESC Guidelines for the diagnosis and treatment of acute and chronic heart failure 2012. *Eur Heart J* 2012;33:1787-847.
2. Serruys PW, Morice MC, Kappetein AP, et al.; SYNTAX Investigators. Percutaneous coronary intervention versus coronary-artery bypass grafting for severe coronary artery disease. *N Engl J Med* 2009;360:961-72.
3. Park SJ, Kim YH, Park DW, et al. Randomized trial of stents versus bypass surgery for left main coronary artery disease. *N Engl J Med* 2011;364:1718-27.
4. Velazquez EJ, Lee KL, Deja MA, et al.; STICH Investigators. Coronary-artery bypass surgery in patients with left ventricular dysfunction. *N Engl J Med* 2011;364:1607-16.
5. Bonow RO, Maurer G, Lee KL, et al.; STICH Trial Investigators. Myocardial viability and survival in ischemic left ventricular dysfunction. *N Engl J Med* 2011;364:1617-25.
6. Panza JA, Holly TA, Asch FM, et al. Inducible myocardial ischemia and outcomes in patients with coronary artery disease and left ventricular dysfunction. *J Am Coll Cardiol* 2013;61:1860-70.
7. Yancy CW, Jessup M, Bozkurt B, et al. 2013 ACCF/AHA guideline for the management of heart failure: a report of the American College of Cardiology Foundation/American Heart Association Task Force on Practice Guidelines. *J Am Coll Cardiol* 2013;62:e147-239.
8. Warren J. Remarks on angina pectoris. *N Engl J Med*;1:1-11.
9. Ekman I, Cleland JG, Swedberg K, et al. Symptoms in patients with heart failure are prognostic predictors: insights from COMET. *J Card Fail* 2005;11:288-92.

10. Mentz RJ, Fiuzat M, Shaw LK, et al. Comparison of clinical characteristics and long-term outcomes of patients with ischemic cardiomyopathy with versus without angina pectoris (from the Duke Databank for Cardiovascular Disease). *Am J Cardiol* 2012;109:1272-7.
11. Velazquez EJ, Lee KL, O'Connor CM, et al.; STICH Investigators. The rationale and design of the Surgical Treatment for Ischemic Heart Failure (STICH) trial. *J Thorac Cardiovasc Surg* 2007;134:1540-7.
12. Jones RH, Velazquez EJ, Michler RE, et al.; STICH Hypothesis 2 Investigators. Coronary bypass surgery with or without surgical ventricular reconstruction. *N Engl J Med* 2009;360:1705-17.
13. Kaplan EL, Meier P. Nonparametric estimation from incomplete observations. *J Am Stat Assoc* 1958;53:457-81.
14. Badar AA, Perez-Moreno AC, Jhund PS, et al. Relationship between angina pectoris and outcomes in patients with heart failure and reduced ejection fraction: an analysis of the Controlled Rosuvastatin Multinational Trial in Heart Failure (CORONA). *Eur Heart J* 2014;35:3426-33.
15. Mentz RJ, Broderick S, Shaw LK, et al. Persistent angina pectoris in ischaemic cardiomyopathy: increased rehospitalization and major adverse cardiac events. *Eur J Heart Fail* 2014;16:854-60.
16. Wrobel K, Stevens SR, Jones RH et al. Influence of baseline characteristics, operative conduct and postoperative course on 30-day outcomes of coronary artery bypass grafting among patients with left ventricular dysfunction: results from the Surgical Treatment for Ischemic Heart Failure (STICH) Trial. *Circulation* 2015;132:720-30.

17. Task Force on Myocardial Revascularization of the European Society of Cardiology (ESC) and the European Association for Cardio-Thoracic Surgery (EACTS). Guidelines on myocardial revascularization. *Eur J Cardiothorac Surg* 2010;38 Suppl:S1-S52.
18. Fihn SD, Gardin JM, Abrams J, et al. 2012 ACCF/AHA/ACP/AATS/PCNA/SCAI/STS Guideline for the diagnosis and management of patients with stable ischemic heart disease: a report of the American College of Cardiology Foundation/American Heart Association Task Force on Practice Guidelines, and the American College of Physicians, American Association for Thoracic Surgery, Preventive Cardiovascular Nurses Association, Society for Cardiovascular Angiography and Interventions, and Society of Thoracic Surgeons. *J Am Coll Cardiol* 2012;60:e44-e164.
19. Hillis LD, Smith PK, Anderson JL, et al. 2011 ACCF/AHA Guideline for Coronary Artery Bypass Graft Surgery. A Report of the American College of Cardiology Foundation/American Heart Association Task Force on Practice Guidelines Developed in Collaboration With the American Association for Thoracic Surgery, Society of Cardiovascular Anesthesiologists, and Society of Thoracic Surgeons. *J Am Coll Cardiol* 2011;58:e123-e210.
20. Cleland JG, Calvert M, Freemantle N, et al. The Heart Failure Revascularisation Trial (HEART). *Eur J Heart Fail* 2011;13:227-33.
21. King's College, London. Study of Efficacy and Safety of Percutaneous Coronary Intervention to Improve Survival in Heart Failure (REVIVED-BCIS2). 2015. Available at: <http://clinicaltrials.gov/show/NCT01920048>. Accessed August 30, 2015.

22. Mancini GB, Hartigan PM, Shaw LJ, et al. Predicting outcome in the COURAGE trial (Clinical Outcomes Utilizing Revascularization and Aggressive Drug Evaluation): coronary anatomy versus ischemia. *J Am Coll Cardiol Intv* 2014;7:195-201.
23. BARI 2D Study Group. A randomized trial of therapies for type 2 diabetes and coronary artery disease. *N Engl J Med* 2009;360:2503-15.
24. Shaw LJ, Cerqueira MD, Brooks MM, et al. Impact of left ventricular function and the extent of ischemia and scar by stress myocardial perfusion imaging on prognosis and therapeutic risk reduction in diabetic patients with coronary artery disease: results from the Bypass Angioplasty Revascularization Investigation 2 Diabetes (BARI 2D) trial. *J Nucl Cardiol* 2012;19:658-69.
25. Panza JA, Velazquez EJ, She L, et al. Extent of coronary and myocardial disease and benefit from surgical revascularization in ischemic LV dysfunction [Corrected]. *J Am Coll Cardiol* 2014;64:553-61.
26. Beanlands RS, Nichol G, Huszti E, et al.; PARR-2 Investigators. F-18-fluorodeoxyglucose positron emission tomography imaging-assisted management of patients with severe left ventricular dysfunction and suspected coronary disease: a randomized, controlled trial (PARR-2). *J Am Coll Cardiol* 2007;50:2002-12.
27. Canto JG, Fincher C, Kiefe CI, et al. Atypical presentations among Medicare beneficiaries with unstable angina pectoris. *Am J Cardiol* 2002;90:248-53.

## **FIGURE LEGENDS:**

### **Central Illustration. The STICH Angina Substudy: The Interaction of Angina, Revascularization, and Outcomes in Patients With LV Systolic Dysfunction and Coronary Artery Disease**

The presence of angina does not confer a markedly poorer prognosis in medically treated patient. By intention-to-treat, mortality rates are similar in patients assigned to CABG or to medical therapy, whether angina is present or not. Patients treated with CABG had greater improvement in CCS angina class compared to patients treated with medical therapy only, but the treatment effect diminishes over time. Angina, unless recalcitrant to medical therapy, does not appear useful in selecting patients with CAD, heart failure and LV systolic dysfunction for CABG. CABG = coronary artery bypass graft; CAD = coronary artery disease; CCS = Canadian Cardiology Society; LV = left ventricular.

### **Figure 1. Kaplan-Meier Estimates: Cumulative Incidence of All-Cause Mortality in Medically Treated Patients With and Without Angina**

Amongst patients assigned to medical therapy, all-cause mortality was similar in patients with and without angina (HR: 1.05; 95% CI: 0.79 to 1.38).

### **Figure 2. Adjusted Cox Proportional Hazards Estimates of the Cumulative Risk of All-Cause Mortality According to Angina Status and Treatment Arm**

The effect of CABG was similar whether the patient had angina (HR: 0.89; 95% CI: 0.71 to 1.13) or not (HR: 0.68; 95% CI: 0.50 to 0.94) (p interaction = 0.14). Analyses adjusted for LVEF, age, BMI (above or below 35), log of creatinine (0 to 0.4), peripheral vascular disease, mitral regurgitation, beta-blockers at baseline, atrial fibrillation/flutter. BMI = body mass index;

CABG = coronary artery bypass graft; CI = confidence interval; LVEF = left ventricular ejection fraction.

**Table 1. Baseline Characteristics by Presence of Angina in the STICH Trial**

| <b>Characteristics</b>                      | <b>Angina<br/>(n = 770)</b> | <b>No angina<br/>(n = 442)</b> | <b>p Value</b> |
|---------------------------------------------|-----------------------------|--------------------------------|----------------|
| Treatment Group                             |                             |                                | 0.52           |
| Medical therapy alone                       | 377 (49.0%)                 | 225 (50.9%)                    |                |
| CABG + medical therapy                      | 393 (51.0%)                 | 217 (49.1%)                    |                |
| <b>Demographics</b>                         |                             |                                |                |
| Age, median (IQR), yrs                      | 59 (53, 66)                 | 61 (54-69)                     | <0.001         |
| Sex, male, number (%)                       | 671 (87.1%)                 | 393 (88.9%)                    | 0.37           |
| BMI, median (IQR), kg/m <sup>2</sup>        | 27 (24, 30)                 | 27 (24-30)                     | 0.76           |
| Race or ethnic group, number (%)            |                             |                                | <0.001         |
| White                                       | 494 (64.2%)                 | 333 (75.3%)                    |                |
| Hispanic, Latino, or nonwhite               | 276 (35.8%)                 | 109 (24.7%)                    |                |
| <b>Medical history, number (%)</b>          |                             |                                |                |
| Previous myocardial infarction              | 633 (82.2%)                 | 301 (68.1%)                    | <0.001         |
| Diabetes mellitus                           | 278 (36.1 %)                | 200 (45.2 %)                   | <0.01          |
| Hypertension                                | 454 (59.0 %)                | 274 (62.0 %)                   | 0.30           |
| Hyperlipidemia                              | 436 (56.6 %)                | 294 (66.5 %)                   | <0.001         |
| Previous coronary artery bypass surgery     | 24 (3.1 %)                  | 12 (2.7 %)                     | 0.69           |
| Previous percutaneous coronary intervention | 97 (12.6 %)                 | 59 (13.3 %)                    | 0.71           |



|                              |             |             |        |
|------------------------------|-------------|-------------|--------|
| Chronic renal insufficiency* | 44 (5.7 %)  | 50 (11.3 %) | <0.001 |
| Previous stroke              | 48 (6.2 %)  | 44 (10.0 %) | 0.02   |
| Atrial flutter/fibrillation  | 83 (10.8%)  | 70 (15.8%)  | 0.01   |
| Peripheral vascular disease  | 109 (14.2%) | 75 (17.0%)  | 0.19   |

Presenting characteristics

|                                              |                   |                  |        |
|----------------------------------------------|-------------------|------------------|--------|
| Systolic blood pressure, median (IQR), mm Hg | 120 (110, 130)    | 120 (110-130)    | 0.002  |
| CSS class, number (%)                        |                   |                  |        |
| 0                                            | --                | 442 (100%)       |        |
| I                                            | 187 (24.3%)       | --               |        |
| II                                           | 525 (68.2%)       | --               |        |
| III                                          | 48 (6.2%)         | --               |        |
| IV                                           | 10 (1.3%)         | --               |        |
| NYHA class, number (%)                       |                   |                  | <0.001 |
| I                                            | 261 (33.9%)       | 174 (39.6%)      |        |
| II                                           | 373 (48.4%)       | 181 (41.2%)      |        |
| III                                          | 112 (14.5%)       | 69 (15.7%)       |        |
| IV                                           | 24 (3.1%)         | 15 (3.4%)        |        |
| Hemoglobin, median (IQR), g/dl               | 14 (13, 15)       | 14 (13-15)       | 0.23   |
| Creatinine, median (IQR), mg/dl              | 1.09 (0.94, 1.24) | 1.10 (0.94-1.30) | 0.04   |
| Left ventricular ejection fraction, median   | 28 (22, 34)       | 27 (22-33)       | 0.06   |

(IQR), %

|                                              |              |             |      |
|----------------------------------------------|--------------|-------------|------|
| Left ventricular end-systolic volume indexed | 80 (61, 108) | 83 (62-109) | 0.44 |
| Myocardial viability†                        | 285 (78.1%)  | 202 (85.6%) | 0.02 |
| Mitral regurgitation, number (%)             |              |             | 0.11 |
| none/trace (1+)                              | 261 (33.9%)  | 174 (39.6%) |      |
| mild (2+)                                    | 373 (48.4%)  | 181 (41.2%) |      |
| moderate (3+)                                | 112 (14.5%)  | 69 (15.7%)  |      |
| severe (4+)                                  | 24 (3.1%)    | 15 (3.4%)   |      |

Angiographic information

---

|                              |             |             |      |
|------------------------------|-------------|-------------|------|
| Duke CAD index, median (IQR) | 65 (39, 77) | 52 (39, 77) | 0.29 |
| Left main disease            | 19 (2.5%)   | 13 (2.9%)   | 0.62 |
| 1-vessel disease             | 76 (9.9%)   | 36 (8.1%)   | 0.32 |
| 2-vessel disease             | 230 (29.9%) | 136 (30.8%) | 0.74 |
| 3-vessel disease             | 463 (60.1%) | 270 (61.1%) | 0.74 |

Medications, number (%)

---

|                      |             |             |        |
|----------------------|-------------|-------------|--------|
| Beta-blockers        | 662 (86.0%) | 374 (84.6%) | 0.52   |
| Long-acting nitrates | 484 (62.9%) | 162 (36.7%) | <0.001 |

---

\*Defined as creatinine >1.5: mg/dl.

†A total of 601 patients underwent viability assessment in the trial.

BMI = body mass index; CABG = coronary artery bypass grafting; CAD = coronary artery disease; CCS = Canadian Cardiovascular Society; IQR = interquartile range; NYHA = New York Heart Association

**Table 2. Stratified Outcomes Analysis for Medical Therapy Alone Versus CABG by Presence of Angina at Baseline**

| <b>Event</b>                                                                                  | <b>Medical Therapy Alone (n = 602)</b> | <b>CABG + Medical Therapy (n = 610)</b> | <b>Adjusted Hazard Ratio for CABG + Medical Therapy (95% CI) *†</b> | <b>p Value</b> |
|-----------------------------------------------------------------------------------------------|----------------------------------------|-----------------------------------------|---------------------------------------------------------------------|----------------|
| <b>No angina at baseline (n = 442)</b>                                                        |                                        |                                         |                                                                     |                |
|                                                                                               | (n = 225)                              | (n = 217)                               |                                                                     |                |
| <b>All-cause mortality</b>                                                                    |                                        |                                         | 0.68 (0.50-0.94)                                                    | 0.02           |
| Number of events (crude event rate, %)                                                        | 96 (42.7%)                             | 71(32.7%)                               |                                                                     |                |
| KM estimate of 5-yr event rate (%)                                                            | 41.0%                                  | 31.9%                                   |                                                                     |                |
| Adjusted Cox proportional hazard estimates of cumulative risk of all-cause death at 5 yrs (%) | 32.9%                                  | 25.0%                                   |                                                                     |                |
| <b>All-cause mortality or all-cause hospitalization</b>                                       |                                        |                                         | 0.80 (0.64-1.00)                                                    | 0.05           |
| Number of events (crude event rate, %)                                                        | 172 (76.4%)                            | 149 (68.7%)                             |                                                                     |                |
| KM estimate of 5-yr event rate (%)                                                            | 79.0%                                  | 68.1%                                   |                                                                     |                |

| Angina at baseline (n =770)                                                                   | (n = 377)   | (n = 393)   |                  |        |
|-----------------------------------------------------------------------------------------------|-------------|-------------|------------------|--------|
| <b>All-cause mortality</b>                                                                    |             |             | 0.89 (0.71-1.13) | 0.34   |
| Number of events (crude event rate, %)                                                        | 149 (39.5%) | 147 (37.4%) |                  |        |
| KM estimate of 5-year event rate (%)                                                          | 39.8%       | 36.8%       |                  |        |
| Adjusted Cox proportional hazard estimates of cumulative risk of all-cause death at 5 yrs (%) | 37.2%       | 33.2%       |                  |        |
| <b>All-cause mortality or all-cause hospitalization</b>                                       |             |             | 0.78 (0.66-0.93) | <0.001 |
| Number of events (crude event rate, %)                                                        | 270 (71.6%) | 250 (63.6%) |                  |        |
| KM estimate of 5-year event rate (%)                                                          | 72.2%       | 63.8%       |                  |        |

Of 1,212 patients randomized in STICH, 1,205 with known angina status at baseline were included in the multivariable statistical analysis. Implantation of a left ventricular assist device during follow-up was considered as equivalent to death (n = 1).

\*All-cause death analysis was adjusted for LVEF, age, BMI (<35), log of creatinine (0 to 0.4), peripheral vascular disease, mitral regurgitation, beta-blocker at baseline, and atrial fibrillation/flutter. The p interaction for angina and treatment (medical therapy alone or CABG) = 0.14

†All-cause death plus all-cause hospitalization analyses were adjusted for treatment group (CABG vs. medical therapy alone), LVEF, age, white race, log of creatinine (< 0.4), hemoglobin, mitral regurgitation, and NYHA classification. The p interaction for angina and treatment (medical therapy alone or CABG) = 0.99.

The following values were assigned to baseline covariates for adjusted event rates: age = 60 years; LVEF = 28; BMI = 27; log<sub>2</sub>(creatinine) = 0.14; PVD = 0.15; mitral valve regurgitation (moderate/severe) = 0.18; beta-blocker = 0.85; and atrial fibrillation/flutter = 0.13.

KM = Kaplan-Meier; LVEF = left ventricular ejection fraction. Other abbreviations as in **Table**

**1.**

**Table 3. Odds Ratios of Worsening Angina for Patients Treated with CABG Compared With Patients Treated with Medical Therapy Alone**

| <b>Models</b>                                                                    | <b>OR (95% CI)</b> | <b>p Value</b> |
|----------------------------------------------------------------------------------|--------------------|----------------|
| Unadjusted data                                                                  | 0.70 (0.55-0.89)   | < 0.01         |
| Third principal model*                                                           | 0.70 (0.55-0.90)   | < 0.01         |
| Sensitivity analyses                                                             |                    |                |
| 1. Proportional odds model (angina as 3-level categorical variable)†             | 0.69 (0.55-0.87)   | < 0.01         |
| 2. Third principal model + adjusted for antiangina medication post-randomization | 0.78 (0.60-1.00)   | 0.05           |
| 3. Worst-case scenario                                                           | 0.77 (0.61-0.98)   | 0.03           |

Of the 1,212 patients randomized in STICH, 1,089 with angina assessed at least once after randomization were included in the statistical model

\*The model is the final adjusted binary logistic regression model. The model remained stable after internal validation (OR: 0.69; 95% CI: 0.54 to 0.89), and after crossover patients were taken into consideration (OR: 0.57; 95% CI: 0.45 to 0.74;  $p < 0.01$ ).

†Proportional odds model defines angina relief as an ordinal 3-level categorical variable with values representing worsening angina, stable angina, and angina relief. The odds ratio supplied is predicting the probability of angina relief averaging over worsening angina and stable angina.

No Angina

Angina

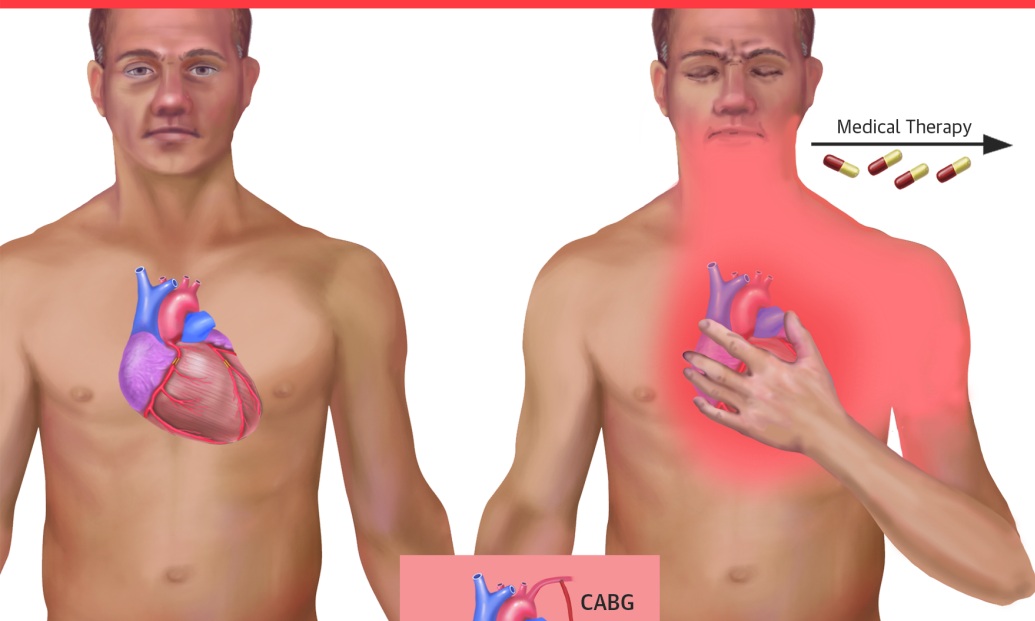

Outcome in Patients Assigned Pharmacological Therapy Alone

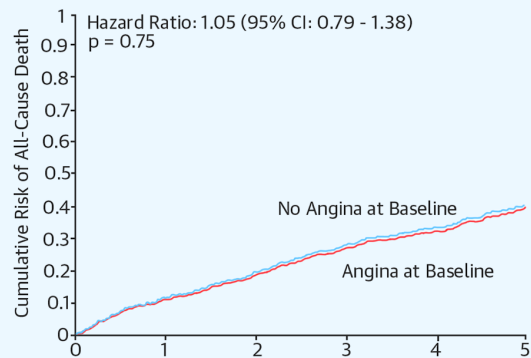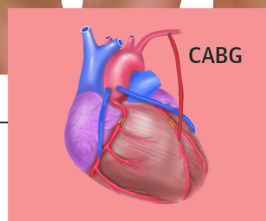

No Angina at Baseline

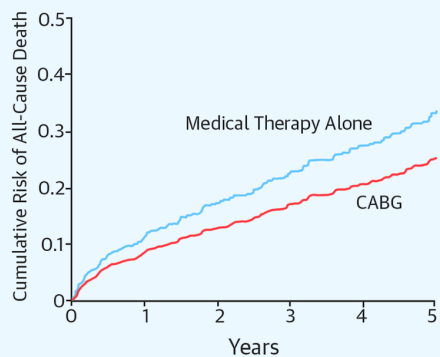

Angina at Baseline

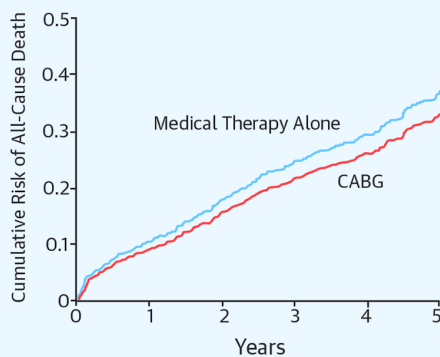



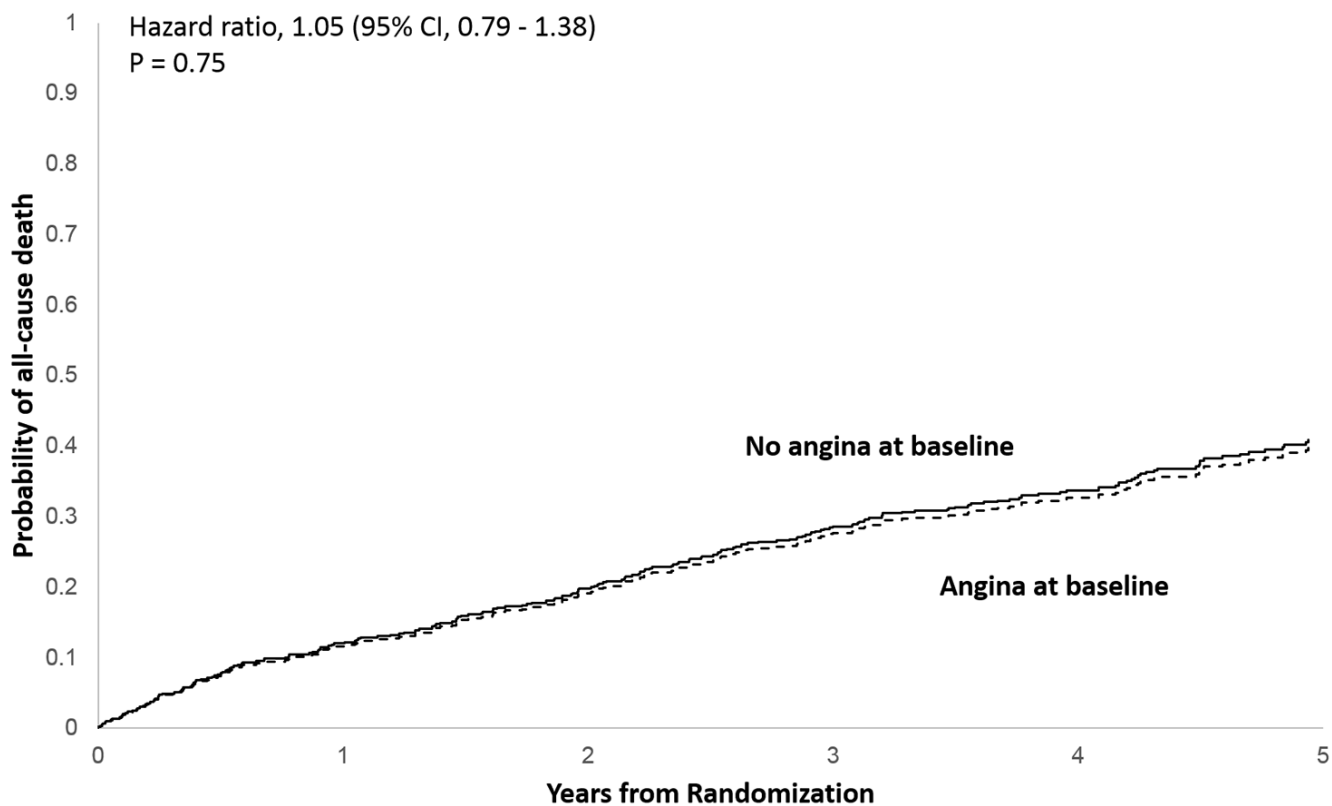

| No. at Risk           |     | 0   | 1   | 2   | 3   | 4  | 5 |
|-----------------------|-----|-----|-----|-----|-----|----|---|
| No Angina at Baseline | 225 | 196 | 180 | 161 | 118 | 57 |   |
| Angina at Baseline    | 377 | 336 | 306 | 274 | 193 | 98 |   |

**A. No Angina at Baseline**

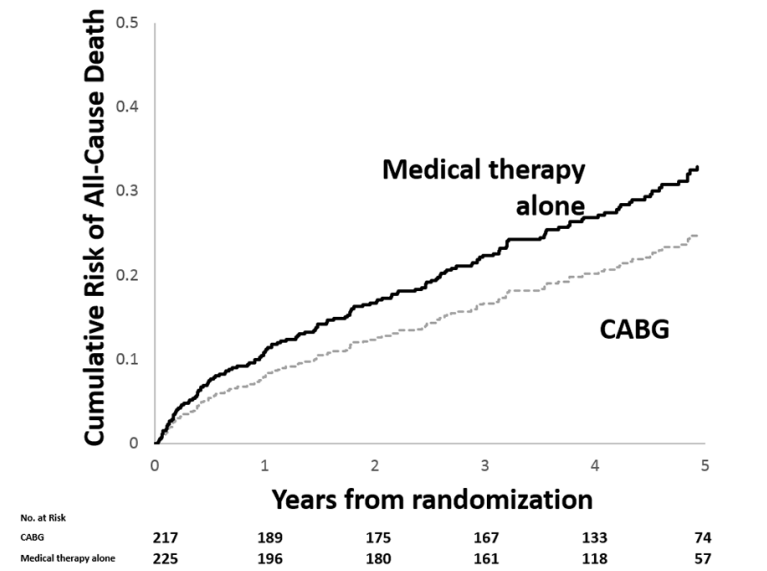

**B. Angina at Baseline**

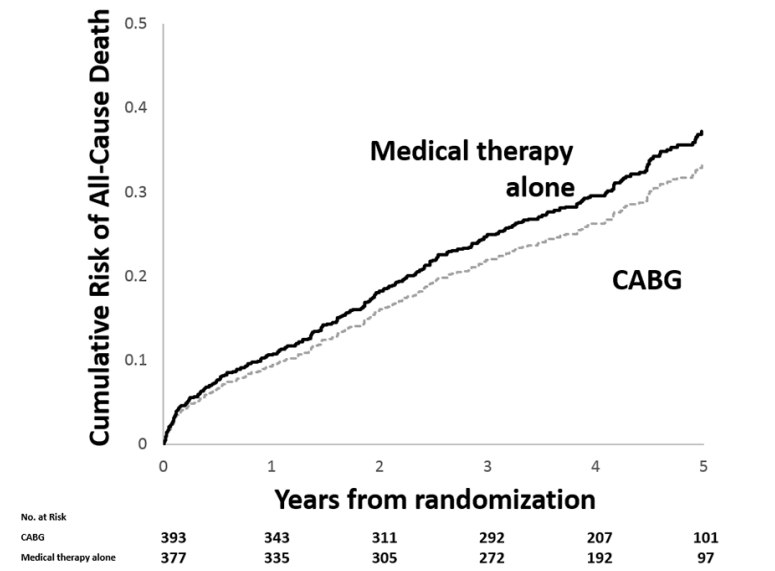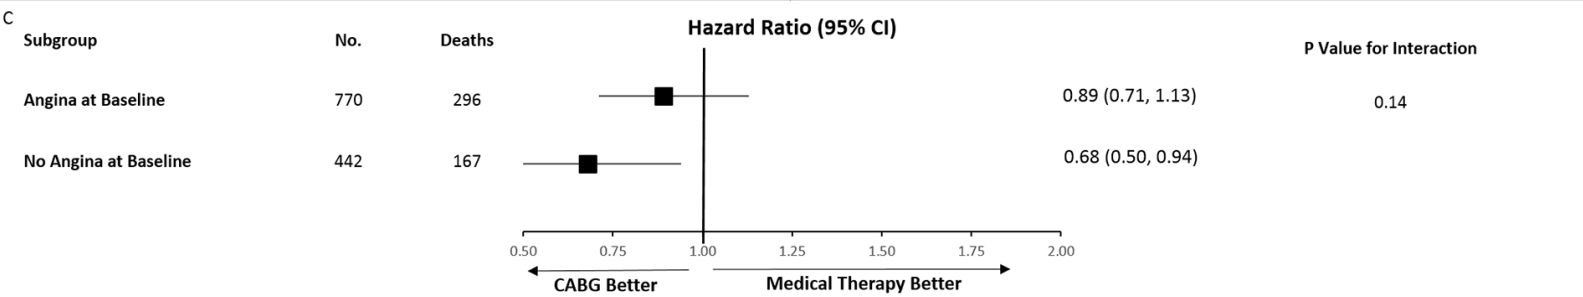

## SUPPLEMENTARY METHODS

### **Modeling of outcomes for first and second analyses**

For both the first and second analyses, the candidate independent predictors included demographics (age, sex, race, body mass index (BMI)), baseline characteristics (pulse pressure, systolic and diastolic blood pressure, hemoglobin, creatinine, LV ejection fraction (LVEF), NYHA functional class, CCS angina class), prior medical history (diabetes mellitus, atrial flutter/fibrillation, peripheral vascular disease, past MI, mitral regurgitation (as none/trace (1+) vs. mild (2+) vs. moderate (3+), vs. severe (4+)), and medication (beta-blockers, long-acting nitrates).

Multivariable models were assembled using a backward stepwise variable selection method with  $p < 0.10$  cut-off used for inclusion in the final model. The Presence of Angina was forced into final models to assess its relationship with endpoints of interest after adjustment for other variables. The linearity assumption was evaluated by applying restricted cubic spline transformations to the continuous measures. The likelihood ratios for models with these transformations were compared with those in the linear models to assess the need for nonlinear terms. In case of nonlinearity, the plot of the restricted cubic spline transformation vs. the log hazard ratio (in the case of the Cox model) of the outcome was used to assist in identifying the appropriate transformations to apply. For survival analyses, the proportionality assumption was assessed by adding a time-dependent variable to the model. Whenever appropriate, the model's discrimination was evaluated by the c-index. The significance of multivariable regression coefficients was assessed with the Wald chi-square. Only patients with complete information were included in the models and no data imputation was performed.

### **Sensitivity analyses for third analysis**

The robustness of the association between angina relief and revascularization was ascertained in 4 sensitivity analyses meant to explore: 1) a possible dose–response relationship between the variation of angina and the candidate predictors; 2) the possible confounding effect of the change in anti-angina medication following randomization; 3) the impact of missing data on angina status at follow-up (worst case scenario); and 4) the concerns around the variability of angina status collected repeatedly at follow-up. In the first sensitivity to explore the possibility of a dose–response relationship between variation of angina class and the candidate predictors, a proportional odds model(1) was implemented where the change in angina classes from baseline to follow-up was treated as a three level ordinal variable with values representing worsening angina, stable angina and angina relief. A second sensitivity analysis looked at the possible confounding effect of the change in anti-angina medication following randomization. In this instance, medication changes were treated as categorical variables, where a value of -1 was assigned to patients taken off the anti-angina medication during the study period, a value of 0 was assigned to patients whose medication status remained the same throughout the study period, and a value of +1 was assigned to patients who started the medication during follow-up. The third sensitivity analysis explored the robustness of our data where patients with missing angina status at follow-up were categorized as deteriorating angina (no  $\geq 1$  CCS angina class improvement; worst case scenario). The fourth sensitivity analysis addressed the concerns around the variability of angina status collected repeatedly at follow-up. To this end, we conducted a repeated measures analysis using linear mixed models. To stabilize the model, we concentrated it on the time frame between 4-60 months, which accounted for more than 90% of the CCS follow-up data collected. We chose the response variable for the model to be the change in CCS angina classification from baseline to each follow-up time point. This was treated as a continuous variable with values ranging from -4 to 4; negative values represent

improvement in CCS angina class from baseline. The final model assumed compound symmetry structure for the between and within subject correlation, was adjusted for baseline CCS angina classification and included the following effects: (1) a treatment effect (CABG vs. Medical Therapy, averaged over all time points); (2) a time effect (ranging from 4-60 months); and (3) a treatment by time interaction effect (is the treatment effect the same across all time points).

## SUPPLEMENTARY RESULTS

### **Effect of crossover on outcomes**

A total of 55 patients assigned to CABG were treated with medical therapy alone, and 65 patients assigned to medical therapy alone underwent CABG. Due to these crossovers, an additional 29 patients with angina initially assigned to medical therapy underwent CABG. Likewise, an additional 11 patients with no angina initially assigned to CABG were treated with medical therapy alone. There was no significant difference in presence and severity of angina at baseline and treatment arm ( $p=0.15$ ). In Patients who did not report angina at baseline, those who underwent CABG as compared with those who received medical therapy alone, had a significantly lower rate of all-cause death (Kaplan-Meier of 7-year event rates: 39.3% vs. 67.4%; adjusted hazard ratio, 0.64; 95% CI, 0.47 to 0.88;  $p < 0.01$ ). Similarly, in patients who reported angina at baseline, those who underwent CABG as compared with those who received medical therapy alone, had similar Kaplan-Meier rates of all-cause death (51.7% vs. 56.7%); but after adjustment for covariates those patients receiving CABG had significantly lower risk of all-cause death (adjusted hazard ratio, 0.67; 95% CI, 0.53 to 0.85;  $p < 0.001$ ) (Supplementary Figure 1, and Supplementary Table 3).

### **Sensitivity analyses for the effect of CABG and medical therapy on relief of angina**

A repeated measures analysis on CCS angina class collected at follow-up visits between 4 and 60 months post randomization, found a significant time by treatment effect. However, further exploration found that while the treatment effect diminished over time, patients receiving CABG consistently displayed a greater improvement in CCS angina classification compared to patients receiving Medical Therapy Only (Supplementary Figure 3)

### REFERENCES

1. McCullagh P. Regression Models for Ordinal Data. Journal of the Royal Statistical Society Series B (Methodological) 1980;42:109-142.

FIGURE LEGENDS:

- Supplementary Figure 1. Effect of Crossovers on Adjusted Cox Proportional Hazards Estimates of the Cumulative Risk of All-Cause Death According to Angina Status and Treatment Arm
- Footnotes: Adjusted for LVEF, age, BMI (<35), log of creatinine (0 to 0.4), peripheral vascular disease, mitral regurgitation, beta-blockers at baseline, atrial fibrillation/flutter (p interaction = 0.74)
- Supplementary Figure 2. Variation in Angina Classes During Follow-Up
- Footnotes: a) patients assigned to medical therapy alone; b) patients assigned to CABG. Figures display only patients who presented angina at baseline. The X axis is actually not proportional in time despite the current representation due to the varying schedule of visits at follow-up.
- Supplementary Figure 3. Patients Assigned to CABG Experienced a Larger Decreases in Angina Class at Follow-Up Compared to Medical Therapy
- Footnotes: The mixed model analysis found that a significant treatment by time interaction effect in which the relieving effect of CABG on angina changes over time to becomes less significant (the difference in changes in CCS angina class between CABG and Medical Therapy gets closer to zero) as follow-up time increases. However, at all time points, CABG consistently provided a larger decrease in change in CCS angina class compared to Medical Therapy.

Supplementary Figure 1. Effect of Crossovers on Adjusted Cox Proportional Hazards Estimates of the Cumulative Risk of All-Cause Death According to Angina Status and Treatment Arm

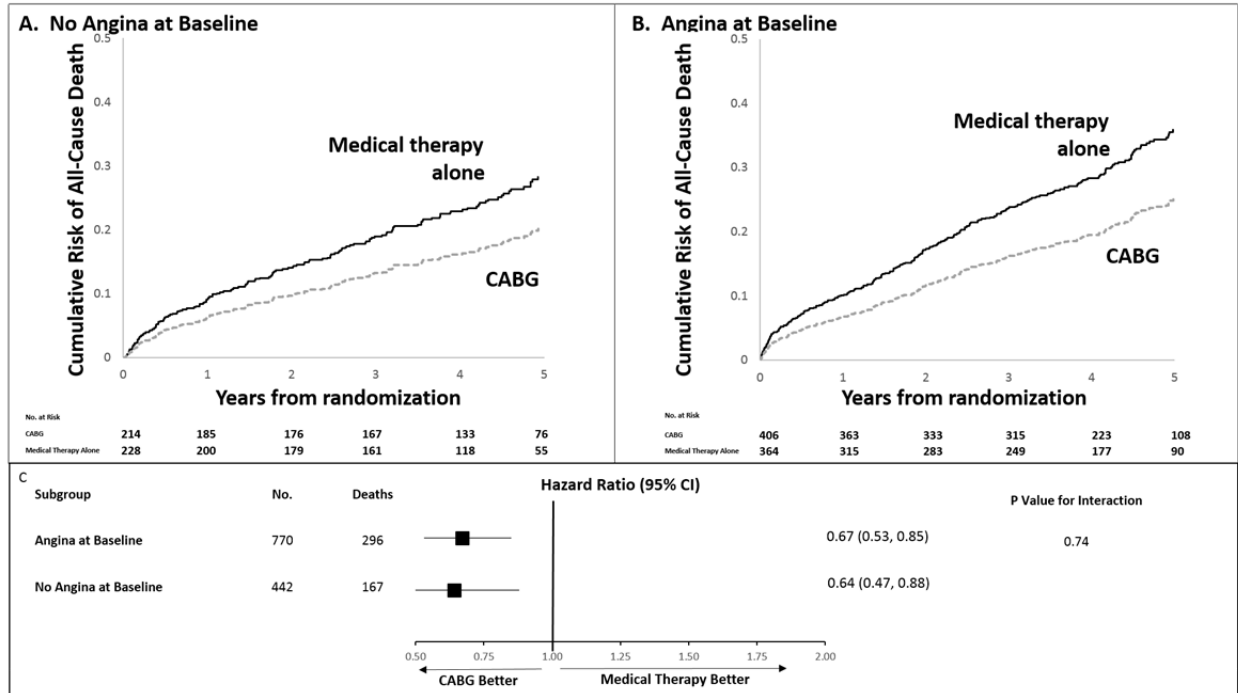



Supplementary Figure 2. Variation in Angina Classes During Follow-Up

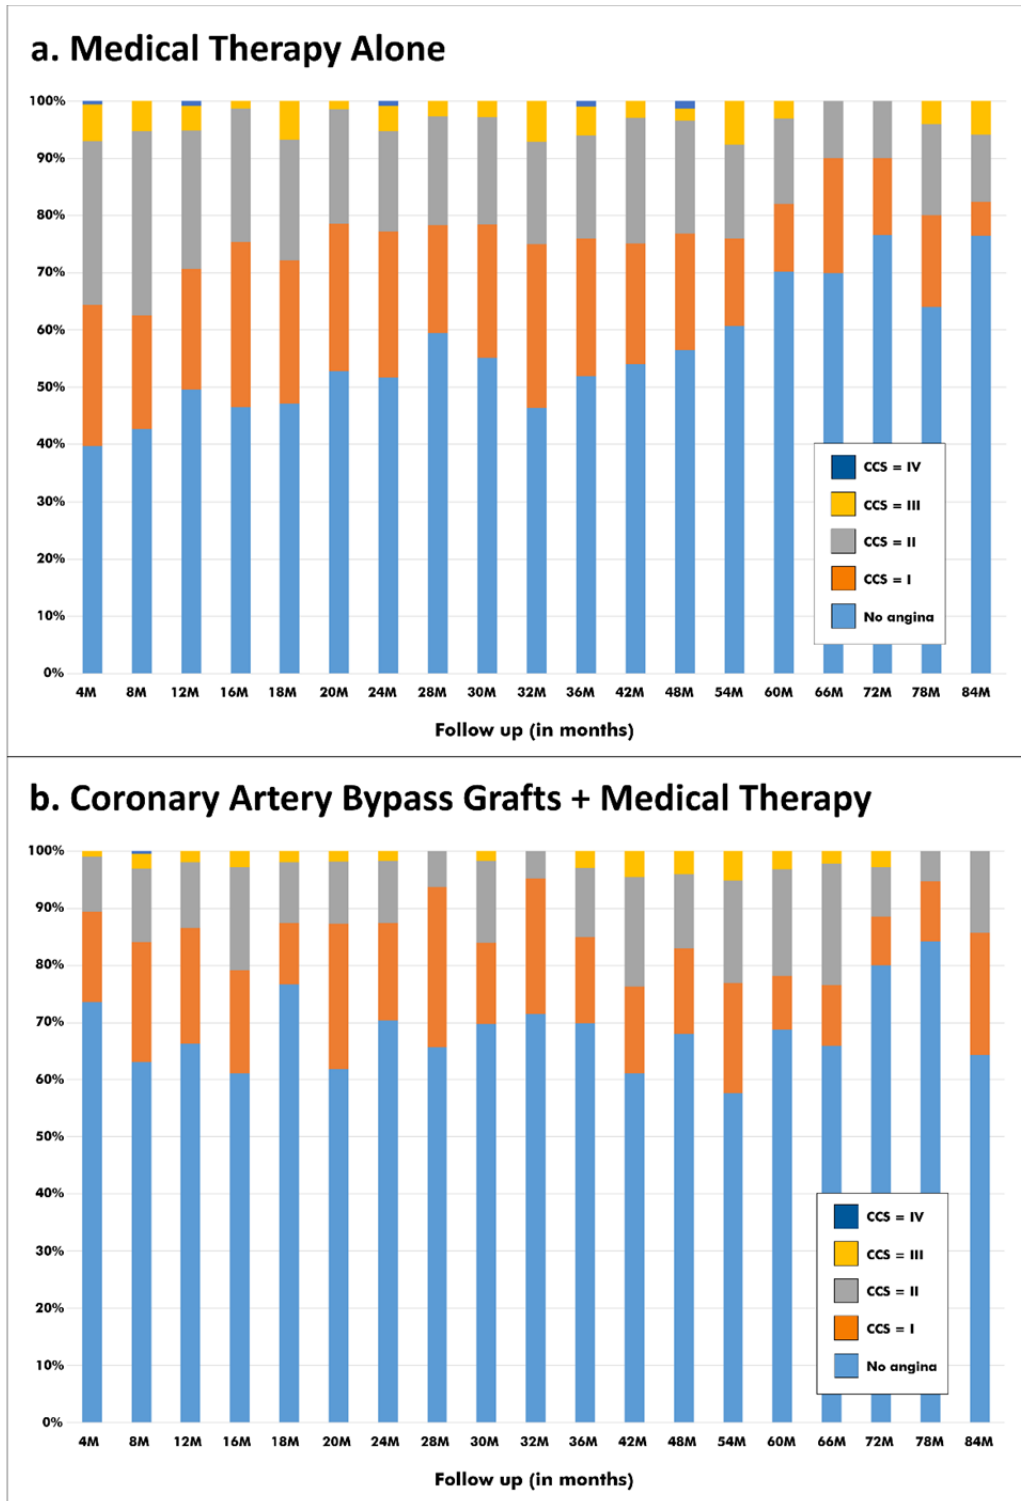

Supplementary Figure 3. Patients Assigned to CABG Experienced a Larger Decreases in Angina Class at Follow-Up Compared to Medical Therapy.

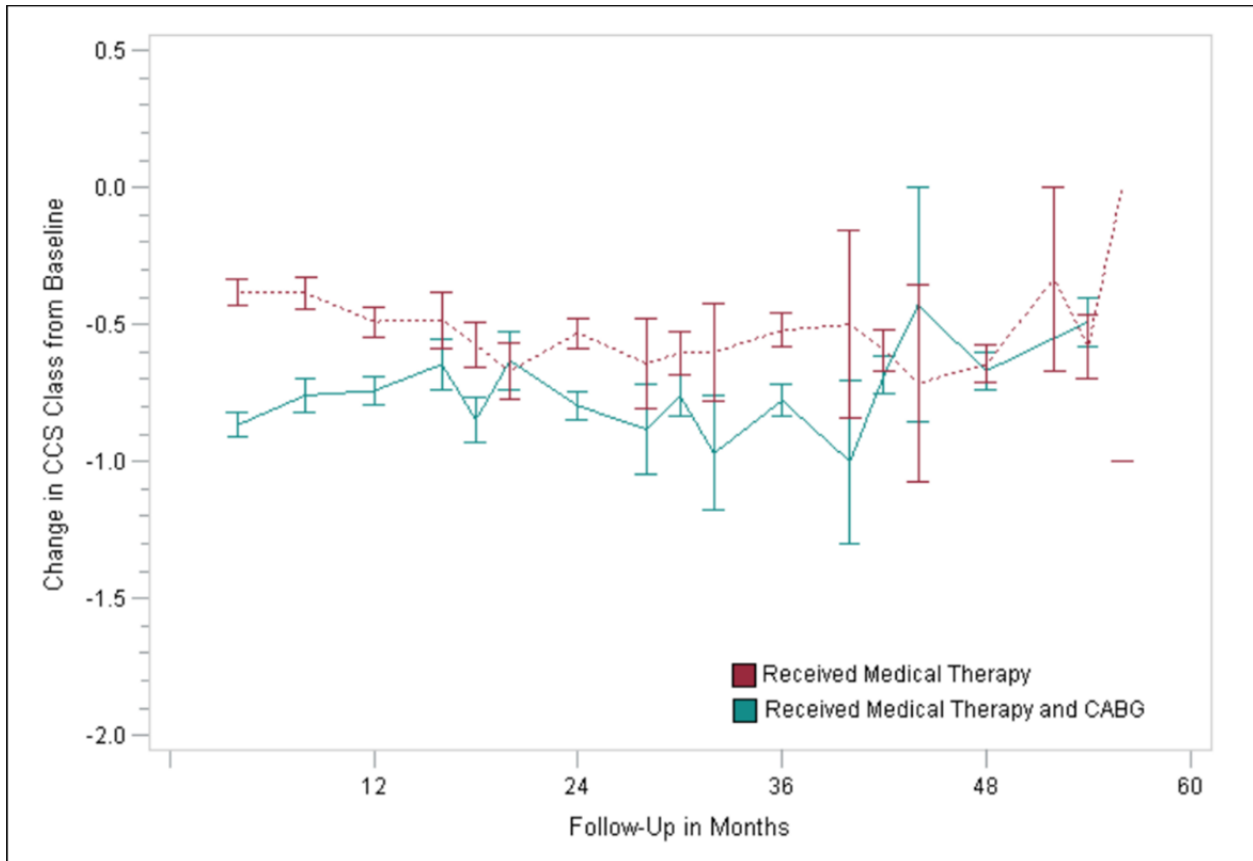

Supplementary Table 1. Baseline Characteristics by Presence of Angina for Patients Assigned to Medical Therapy Alone

| Characteristic                                                        | All Patients (N=602) | No Angina (N=225)    | Angina (N=377)       | p-Value |
|-----------------------------------------------------------------------|----------------------|----------------------|----------------------|---------|
| <b>Age, yrs</b> , median (IQR)                                        | 59 (53, 67)          | 60 (54, 69)          | 58 (53, 66)          | <0.01   |
| <b>Sex</b>                                                            |                      |                      |                      | 0.07    |
| Male                                                                  | 527 (87.5%)          | 204 (90.7%)          | 323 (85.7%)          |         |
| Female                                                                | 75 (12.5%)           | 21 (9.3%)            | 54 (14.3%)           |         |
| <b>Race</b>                                                           |                      |                      |                      | <0.001  |
| non-white                                                             | 182 (30.2%)          | 50 (22.2%)           | 132 (35.0%)          |         |
| white                                                                 | 420 (69.8%)          | 175 (77.8%)          | 245 (65.0%)          |         |
| <b>Body Mass Index (kg/m<sup>2</sup>)</b> , median (IQR)              | 27 (24, 30)          | 26 (24, 29)          | 27 (24, 30)          | 0.12    |
| <b>LVEF</b> , median (IQR)                                            | 28 (22, 34)          | 27 (21, 34)          | 28 (23, 34)          | 0.17    |
| <b>Creatinine (mg/dL)</b> , median (IQR)                              | 1.10 (0.93, 1.27)    | 1.10 (0.93, 1.30)    | 1.09 (0.93, 1.25)    | 0.27    |
| <b>Creatinine Clearance [Cockcroft Gault] (mL/min)</b> , median (IQR) | 76.36 (61.10, 95.55) | 74.39 (58.62, 93.17) | 78.10 (63.06, 97.66) | 0.06    |
| <b>Hemoglobin (g/dL)</b> , median (IQR)                               | 14 (13, 15)          | 14 (13, 15)          | 14 (13, 15)          | 0.18    |
| <b>Diastolic blood pressure</b> , median (IQR)                        | 80 (70, 80)          | 72 (65, 80)          | 80 (70, 80)          | <0.01   |
| <b>Systolic blood pressure</b> , median (IQR)                         | 120 (110, 130)       | 120 (110, 130)       | 120 (110, 130)       | 0.03    |
| <b>Pulse pressure (mmHg)</b> , median (IQR)                           | 45 (40, 50)          | 42 (36, 54)          | 45 (40, 50)          | 0.76    |
| <b>Atrial fibrillation or flutter</b>                                 |                      |                      |                      | <0.01   |
| No                                                                    | 525 (87.2%)          | 184 (81.8%)          | 341 (90.5%)          |         |
| Yes                                                                   | 77 (12.8%)           | 41 (18.2%)           | 36 (9.5%)            |         |
| <b>Peripheral vascular disease</b>                                    |                      |                      |                      | 0.73    |
| No                                                                    | 507 (84.2%)          | 188 (83.6%)          | 319 (84.6%)          |         |
| Yes                                                                   | 95 (15.8%)           | 37 (16.4%)           | 58 (15.4%)           |         |
| <b>Myocardial infarction</b>                                          |                      |                      |                      | <0.001  |
| No                                                                    | 130 (21.6%)          | 69 (30.7%)           | 61 (16.2%)           |         |
| Yes                                                                   | 472 (78.4%)          | 156 (69.3%)          | 316 (83.8%)          |         |
| <b>Mitral regurgitation</b>                                           |                      |                      |                      | 0.36    |
| None or trace                                                         | 222 (37.1%)          | 89 (40.1%)           | 133 (35.3%)          |         |
| Mild <= 2+                                                            | 261 (43.6%)          | 89 (40.1%)           | 172 (45.6%)          |         |
| Moderate 3+                                                           | 98 (16.4%)           | 35 (15.8%)           | 63 (16.7%)           |         |
| Severe 4+                                                             | 18 (3.0%)            | 9 (4.1%)             | 9 (2.4%)             |         |
| <b>Current NYHA heart failure class</b>                               |                      |                      |                      | <0.001  |
| I                                                                     | 74 (12.3%)           | 41 (18.2%)           | 33 (8.8%)            |         |
| II                                                                    | 307 (51.0%)          | 104 (46.2%)          | 203 (53.8%)          |         |
| III                                                                   | 205 (34.1%)          | 69 (30.7%)           | 136 (36.1%)          |         |
| IV                                                                    | 16 (2.7%)            | 11 (4.9%)            | 5 (1.3%)             |         |
| <b>Duke CAD Index (0-100)</b> , median (IQR)                          | 65 (39, 77)          | 52 (39, 77)          | 65 (39, 77)          | 0.03    |

Lack of Significance of Angina in the Selection of Patients with Ischemic Cardiomyopathy for Surgical Revascularization: Insights from the STICH Trial

| Characteristic                  | All Patients<br>(N=602) | No Angina<br>(N=225) | Angina<br>(N=377) | p-<br>Value |
|---------------------------------|-------------------------|----------------------|-------------------|-------------|
| <b>Nitrate at baseline</b>      |                         |                      |                   | <0.001      |
| No                              | 293 (48.7%)             | 148 (65.8%)          | 145 (38.5%)       |             |
| Yes                             | 309 (51.3%)             | 77 (34.2%)           | 232 (61.5%)       |             |
| <b>Beta blocker at baseline</b> |                         |                      |                   | 0.94        |
| No                              | 73 (12.1%)              | 27 (12.0%)           | 46 (12.2%)        |             |
| Yes                             | 529 (87.9%)             | 198 (88.0%)          | 331 (87.8%)       |             |

Patients who reported angina at baseline had higher diastolic blood pressure, higher rates of prior MI, higher NYHA heart failure classification and were more likely to be taking nitrates compared to patients who did not report angina.

BMI, body mass index; CAD, coronary artery disease; CCS, Canadian Cardiovascular Society; mmHg, millimeters of mercury; IQR, interquartile range; mmHg, millimeters of mercury; NYHA, New York Heart Association; No, number; Yrs, years.

Supplementary Table 2A. Predictors of All-Cause Death for Patients Assigned to Medical Therapy Alone with angina dichotomized as Yes vs. No

| Patient Characteristic                               | All Cause Death |                   |         |
|------------------------------------------------------|-----------------|-------------------|---------|
|                                                      | $\chi^2$        | HR (95% CI)       | P-Value |
| LVEF (per 5%)                                        | 14.95           | 0.86 (0.79-0.93)  | <0.001  |
| Log of Creatinine (doubling)                         | 7.36            | 1.53 (1.12-2.07)  | <0.01   |
| Baseline Diastolic BP [70 to 85mmHg] (per 10 mmHg)   | 7.22            | 1.49 (1.11-1.99)  | <0.01   |
| Hemoglobin $\leq$ 14 g/dL (per 1 g/dL)               | 6.37            | 0.86 (0.76-0.97)  | 0.01    |
| Mitral Regurgitation (Severe+Moderate vs. None+Mild) | 5.9             | 1.46 (1.08-1.97)  | 0.02    |
| Age $\leq$ 55 (per 5 years)                          | 4.85            | 0.80 (0.66-0.98)  | 0.03    |
| Baseline Diastolic BP [ $<$ 70 mmHg] (per 10 mmHg)   | 3.97            | 0.74 (0.55-0.995) | 0.04    |
| Age $>$ 55 (per 5 years)                             | 3.57            | 1.10 (0.996-1.21) | 0.05    |
| Atrial Fibrillation / Flutter                        | 3.17            | 1.38 (0.97-1.98)  | 0.07    |
| Hemoglobin $>$ 14 g/dL (per 1 g/dL)                  | 0.64            | 1.06 (0.92-1.24)  | 0.42    |
| Baseline Diastolic BP [ $>$ 85mmHg] (per 10 mmHg)    | 0.44            | 0.86 (0.55-1.35)  | 0.51    |
| Angina (Yes vs. No)                                  | 0.1             | 1.05 (0.79-1.38)  | 0.74    |

LVEF, left ventricular ejection fraction

Supplementary Table 2B. Predictors of All-Cause Death for Patients Assigned to Medical Therapy Alone, with Angina Stratified as Absent, Mild, or Moderate to Severe

| Patient Characteristic                               | All Cause Death |                    |         |
|------------------------------------------------------|-----------------|--------------------|---------|
|                                                      | $\chi^2$        | HR (95% CI)        | P-Value |
| LVEF (per 5%)                                        | 23.85           | 0.87 (0.82, 0.92)  | <0.001  |
| Log of Creatinine [0 to 0.4] (doubling)              | 15.52           | 3.17 (1.79, 5.63)  | <0.001  |
| Age > 55 (per 5 years)                               | 9.69            | 1.12 (1.04, 1.20)  | <0.01   |
| Mitral Regurgitation (Severe+Moderate vs. None+Mild) | 8.95            | 1.40 (1.12, 1.75)  | <0.01   |
| Beta Blocker at Baseline                             | 5.63            | 0.74 (0.58, 0.95)  | 0.02    |
| Moderate to severe Angina (CCS > 1 vs. CCS = 0)      | 5.34            | 1.27 (1.04, 1.57)  | 0.02    |
| Atrial Fibrillation/Flutter                          | 4.87            | 1.34 (1.03, 1.73)  | 0.03    |
| Peripheral Vascular Disease                          | 4.54            | 1.30 (1.02, 1.65)  | 0.03    |
| Body Mass Index $\leq$ 35 (per 1 unit)               | 4.13            | 0.98 (0.95, 0.999) | 0.04    |
| Treatment (CABG vs. Medical Therapy Only)            | 3.73            | 0.83 (0.69, 1.00)  | 0.05    |
| Age $\leq$ 55 (per 5 years)                          | 2.16            | 0.88 (0.75, 1.03)  | 0.11    |
| Mild Angina (CCS = 1 vs. CCS = 0)                    | 0.14            | 1.06 (0.79, 1.41)  | 0.71    |

LVEF, left ventricular ejection fraction

Supplementary Table 3. Survival Analysis for Medical Therapy Alone vs. CABG, with Angina

| Event                                               | Medical therapy alone (n=770) | CABG + Medical therapy (n=442) | Adjusted Hazard Ratio for CABG + Medical Therapy (95% CI) | P-Value |
|-----------------------------------------------------|-------------------------------|--------------------------------|-----------------------------------------------------------|---------|
| No Angina at Baseline (n=442)                       |                               |                                |                                                           |         |
|                                                     | (n = 225)                     | (n = 217)                      |                                                           |         |
| <b>All-cause death</b>                              |                               |                                | 0.68 (0.50, 0.94)                                         | 0.02    |
| No. of events (Crude event rate, %)                 | 96 (42.7%)                    | 71 (32.7%)                     |                                                           |         |
| Kaplan-Meier estimate of 5-year event rate (%)      | 41.0%                         | 31.9%                          |                                                           |         |
| <b>All-cause death or all-cause hospitalization</b> |                               |                                | 0.80 (0.64, 1.00)                                         | 0.05    |
| No. of events (Crude event rate, %)                 | 172 (76.4%)                   | 149 (68.7%)                    |                                                           |         |
| Kaplan-Meier estimate of 5-year event rate (%)      | 79.0%                         | 68.1%                          |                                                           |         |
| Angina at Baseline (CCS = 1) (n=187)                |                               |                                |                                                           |         |
|                                                     | (n = 91)                      | (n = 96)                       |                                                           |         |
| <b>All-cause death</b>                              |                               |                                | 0.83 (0.49, 1.39)                                         | 0.47    |
| No. of events (Crude event rate, %)                 | 35 (38.5%)                    | 33 (34.4%)                     |                                                           |         |
| Kaplan-Meier estimate of 5-year event rate (%)      | 37.1%                         | 34.0%                          |                                                           |         |
| <b>All-cause death or all-cause hospitalization</b> |                               |                                | 0.59 (0.40, 0.86)                                         | <0.01   |
| No. of events (Crude event rate, %)                 | 69 (%)                        | 64 (%)                         |                                                           |         |
| Kaplan-Meier estimate of 5-year event rate (%)      | 77.0%                         | 62.3%                          |                                                           |         |
| Angina at Baseline (CCS > 1)(n=583)                 |                               |                                |                                                           |         |
|                                                     | (n = 286)                     | (n = 297)                      |                                                           |         |
| <b>All-cause death</b>                              |                               |                                | 0.94 (0.73, 1.23)                                         | 0.66    |
| No. of events (Crude event rate, %)                 | 114 (39.9%)                   | 114 (38.4%)                    |                                                           |         |
| Kaplan-Meier estimate of 5-year event rate (%)      | 40.9%                         | 37.9%                          |                                                           |         |
| <b>All-cause death or all-cause hospitalization</b> |                               |                                | 0.84 (0.69, 1.03)                                         | 0.09    |
| No. of events (Crude event rate, %)                 | 201 (70.3%)                   | 186 (62.6%)                    |                                                           |         |
| Kaplan-Meier estimate of 5-year event rate (%)      | 70.7%                         | 64.6%                          |                                                           |         |

Stratified as Absent, Mild, or Moderate to Severe

P interaction for angina\*treatment (medical therapy alone or CABG) p = 0.26 for all-cause death; p = 0.91 for all-cause death and all-cause hospitalization.

Supplementary Table 4. As Treated Analysis: Effect of Crossovers on the Stratified Survival Analysis for CABG vs. Medical Therapy alone by Presence of Angina at Baseline

| Event                                                                                           | Medical therapy alone (n=592) | CABG + Medical therapy (n=620) | Adjusted Hazard Ratio for CABG + Medical Therapy (95% CI) | p-Value |
|-------------------------------------------------------------------------------------------------|-------------------------------|--------------------------------|-----------------------------------------------------------|---------|
| <b>No Angina at Baseline</b>                                                                    | (n = 236)                     | (n = 206)                      |                                                           |         |
| <b>All-cause death</b>                                                                          |                               |                                | 0.64 (0.47, 0.88)                                         | <0.01   |
| No. of events (Crude event rate, %)                                                             | 99 (41.9%)                    | 68 (33.0%)                     |                                                           |         |
| Kaplan-Meier estimate of 5-year event rate (%)                                                  | 41.9%                         | 30.9%                          |                                                           |         |
| Adjusted Cox proportional hazard estimates of cumulative risk of all-cause death at 5 years (%) | 28.2%                         | 20.1%                          |                                                           |         |
| <b>Angina at Baseline</b>                                                                       | (n = 348)                     | (n = 422)                      |                                                           |         |
| <b>All-cause death</b>                                                                          |                               |                                | 0.67 (0.53, 0.85)                                         | <0.001  |
| No. of events (crude event rate, %)                                                             | 161 (46.3%)                   | 135 (32.0%)                    |                                                           |         |
| Kaplan-Meier estimate of 5-year event rate (%)                                                  | 44.7%                         | 32.6%                          |                                                           |         |
| Adjusted Cox proportional hazard estimates of cumulative risk of all-cause death at 5 years (%) | 35.9%                         | 25.1%                          |                                                           |         |

All-cause death analysis was adjusted for LVEF, age, BMI (<35), log of creatinine (0 to 0.4), peripheral vascular disease, mitral regurgitation, beta blocker at baseline, atrial fibrillation / flutter. P interaction for angina and treatment (medical therapy alone or CABG), p = 0.74  
 BMI, body mass index; CABG, coronary artery bypass grafting; KM, Kaplan Meier; LVEF, left ventricle ejection fraction; No, number; NYHA, New York Heart Association



Supplementary Table 5. Cardiovascular endpoints for Medical Therapy Alone vs. CABG by Presence of Angina at Baseline

|                                            | No Angina at Baseline (n=442)        |                                       |                                                 | Angina at Baseline (n =770)          |                                       |                                                 |                      |
|--------------------------------------------|--------------------------------------|---------------------------------------|-------------------------------------------------|--------------------------------------|---------------------------------------|-------------------------------------------------|----------------------|
| <b>Events</b><br>No. (Crude event rate, %) | <b>Medical therapy alone (n=225)</b> | <b>CABG + Medical therapy (n=217)</b> | <b>HR for CABG + Medical Therapy (95% CI)**</b> | <b>Medical therapy alone (n=377)</b> | <b>CABG + Medical therapy (n=393)</b> | <b>HR for CABG + Medical Therapy (95% CI)**</b> | <i>p</i> interaction |
| <b>Cardiovascular death</b>                | 80 (35.6%)                           | 53 (24.4%)                            | 0.64 (0.45-0.91)                                | 121 (32.1%)                          | 115 (29.2%)                           | 0.92 (0.71-1.19)                                | 0.10                 |
| <b>Cardiovascular hospitalization</b>      | 110 (48.9%)                          | 81 (37.3%)                            | 0.68 (0.51-0.91)                                | 172 (45.6%)                          | 130 (33.1%)                           | 0.66 (0.52-0.83)                                | 0.90                 |
| <b>Revascularization*</b>                  | 35 (15.6%)                           | 9 (4.1%)                              | 0.52 (0.22-1.24)                                | 93 (24.7%)                           | 18 (4.6%)                             | 0.16 (0.10-0.27)                                | 0.39                 |
| <b>Myocardial infarction*</b>              | 15 (6.7%)                            | 9 (4.1%)                              | 0.52 (0.22-1.24)                                | 27 (7.2%)                            | 21 (5.3%)                             | 0.71 (0.40-1.27)                                | 0.54                 |

\*Endpoint not adjudicated; \*\*unadjusted analysis

CABG, coronary artery bypass graft; CI, confidence interval; HR, Hazards ratio; No, number of events

**A. No Angina at Baseline**

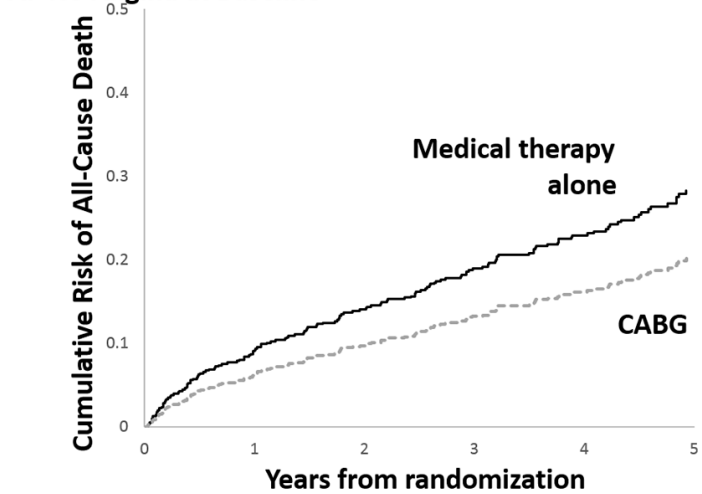

| No. at Risk           | 0   | 1   | 2   | 3   | 4   | 5  |
|-----------------------|-----|-----|-----|-----|-----|----|
| CABG                  | 214 | 185 | 176 | 167 | 133 | 76 |
| Medical Therapy Alone | 228 | 200 | 179 | 161 | 118 | 55 |

**B. Angina at Baseline**

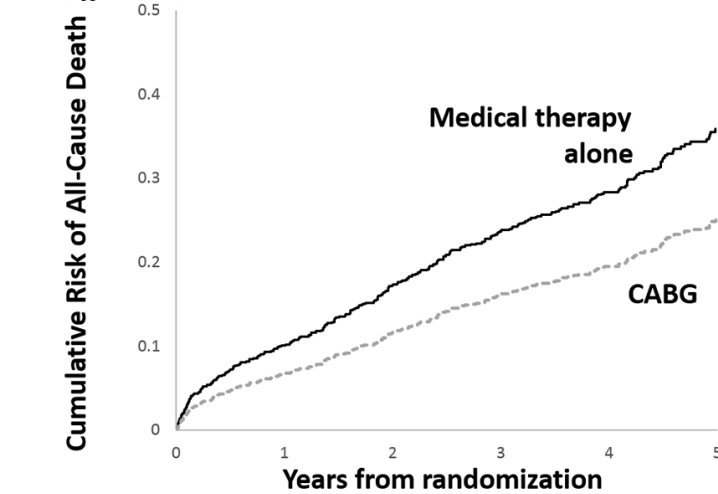

| No. at Risk           | 0   | 1   | 2   | 3   | 4   | 5   |
|-----------------------|-----|-----|-----|-----|-----|-----|
| CABG                  | 406 | 363 | 333 | 315 | 223 | 108 |
| Medical Therapy Alone | 364 | 315 | 283 | 249 | 177 | 90  |

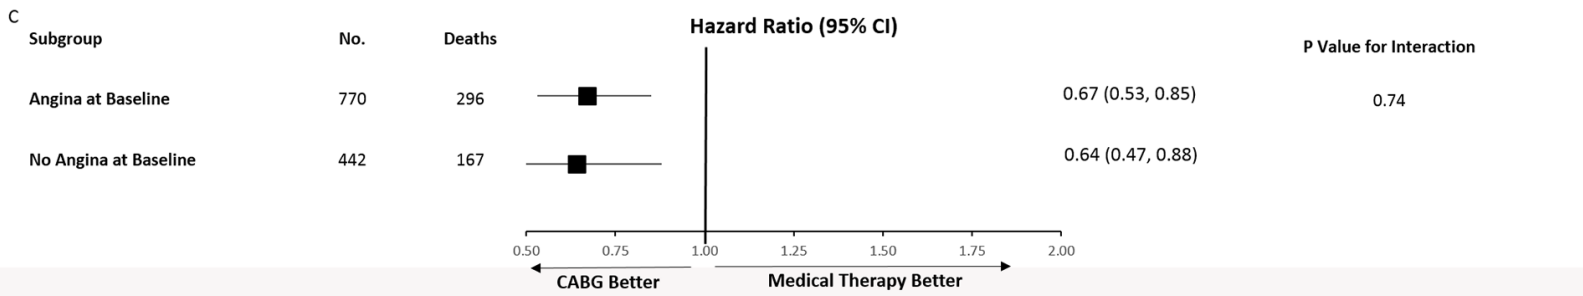

## a. Medical Therapy Alone

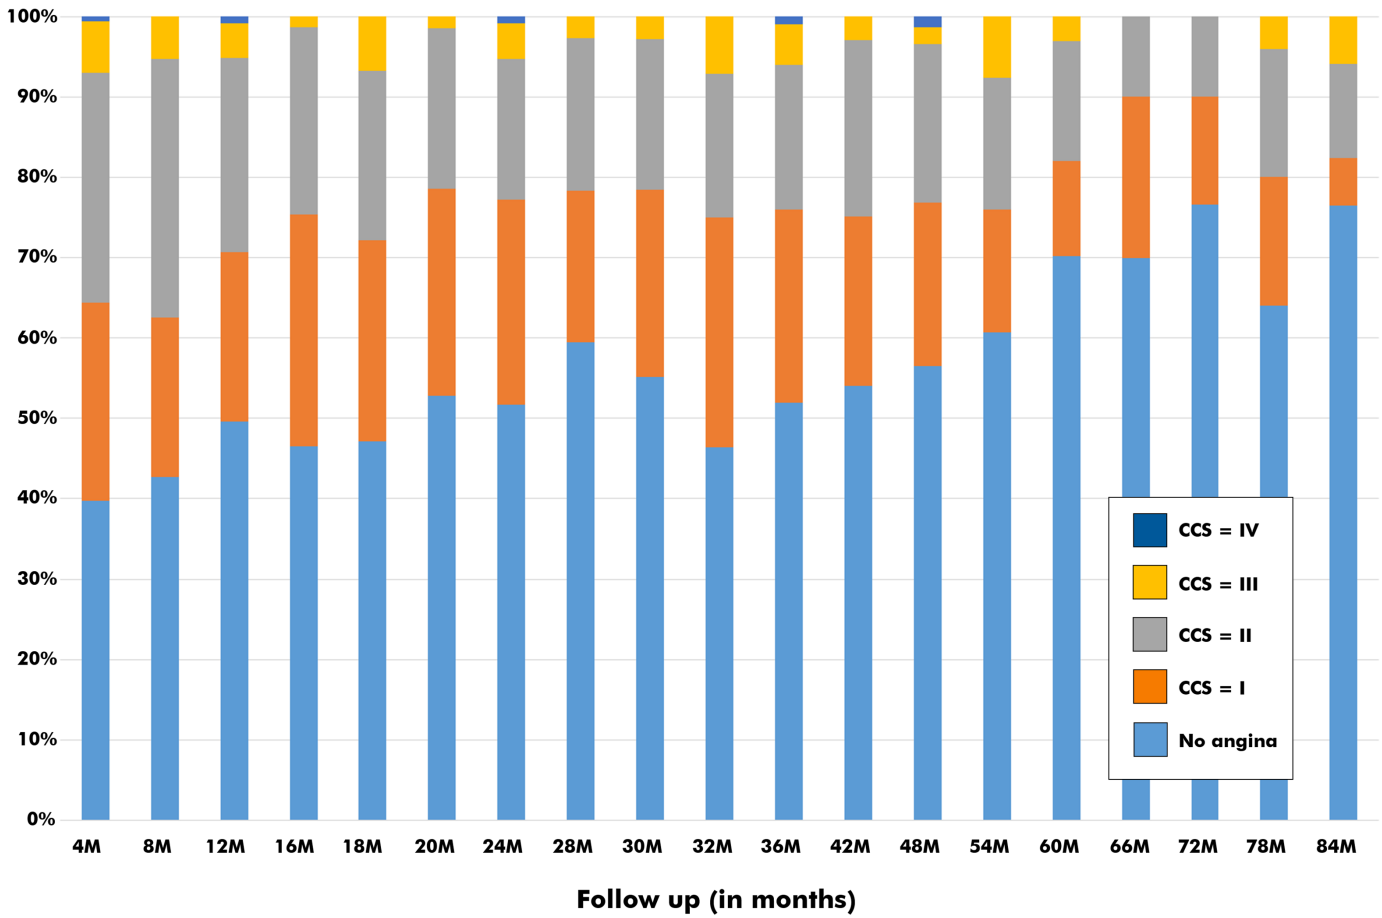

## b. Coronary Artery Bypass Grafts + Medical Therapy

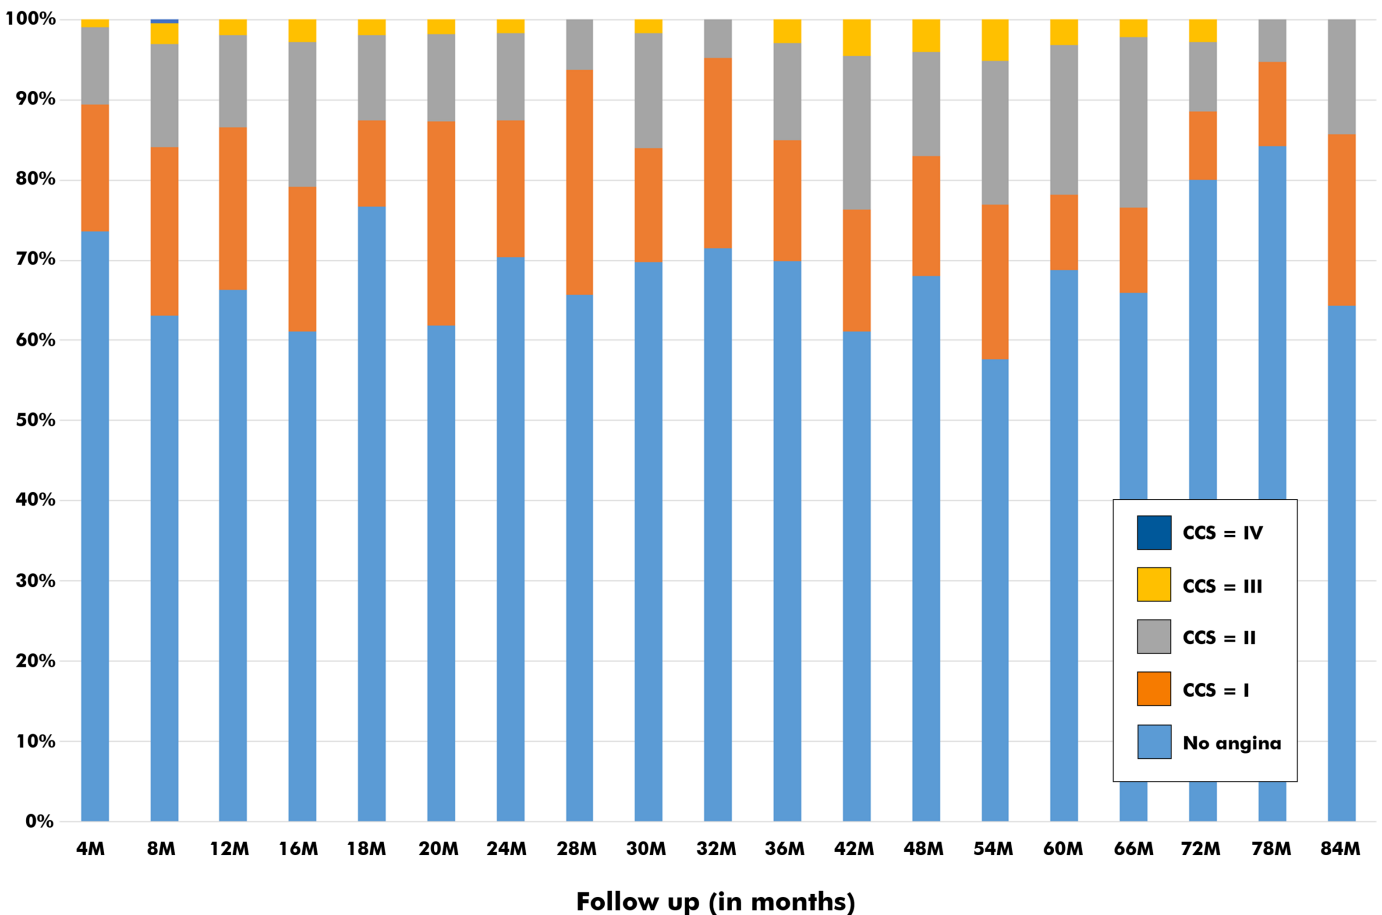

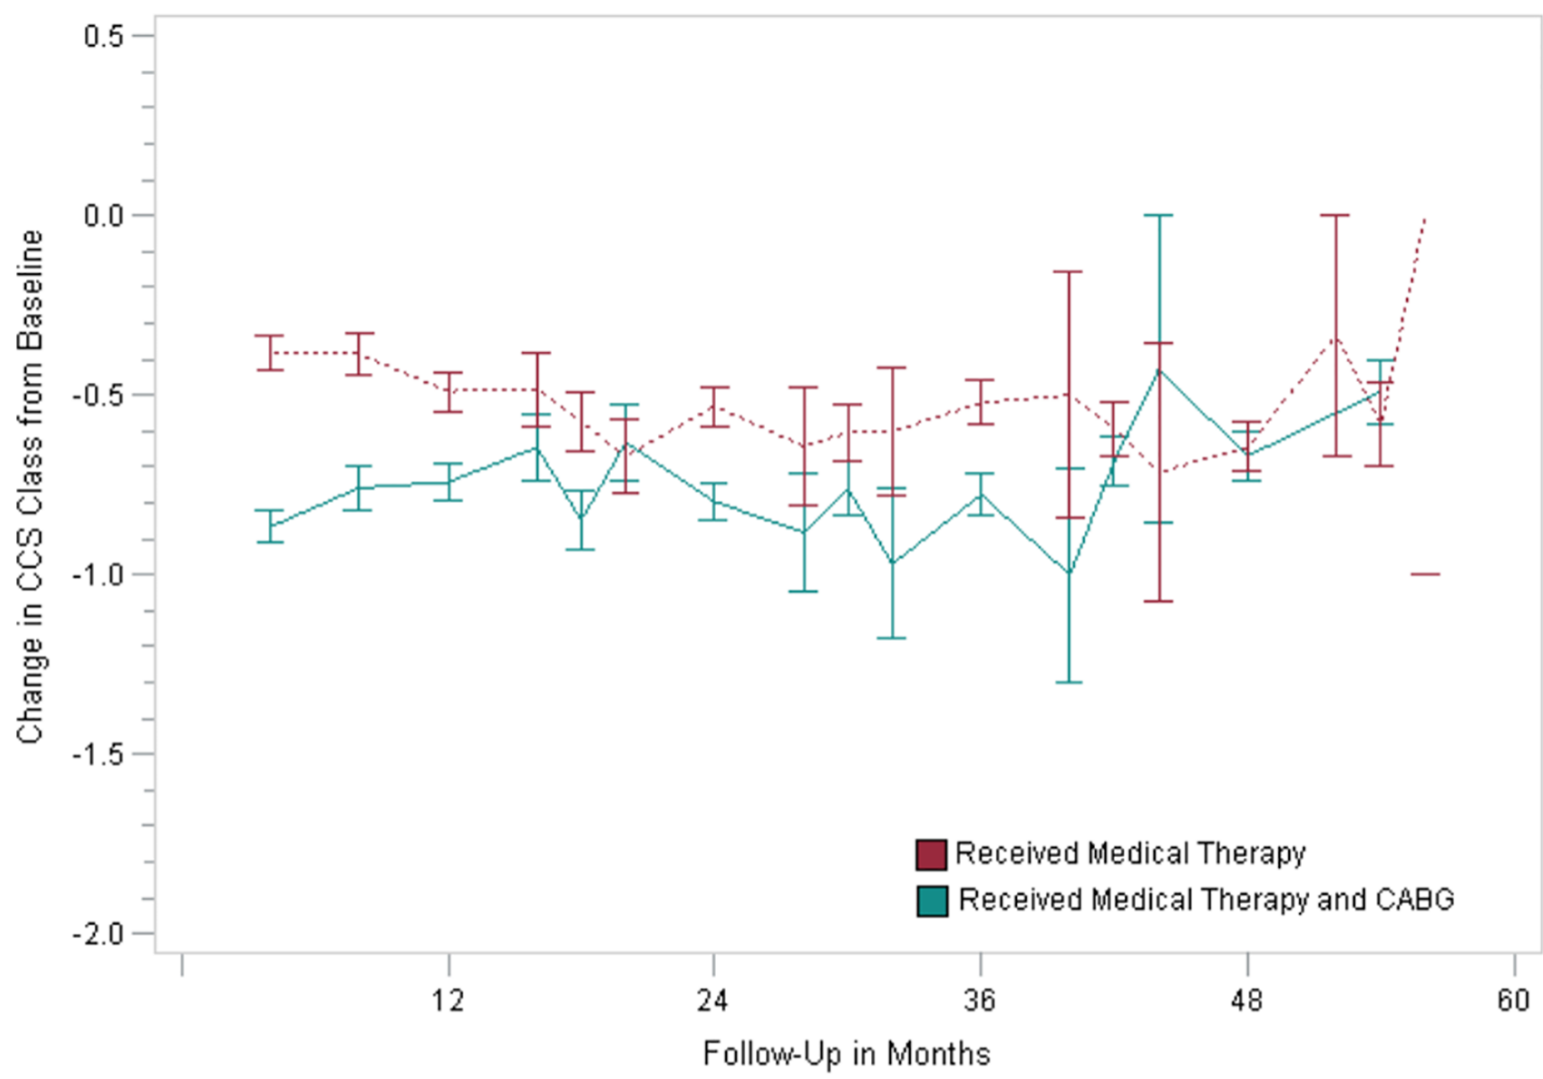

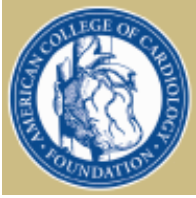

AMERICAN COLLEGE OF CARDIOLOGY FOUNDATION  
AUTHOR RESPONSIBILITIES: RELATIONSHIP WITH INDUSTRY AND FINANCIAL DISCLOSURE

In addition to disclosing relationship with industry and/or financial disclosures on the *cover letter* and *title* page of your manuscript, we ask that each author sign this form.

**To be published in the following journal (please check):**

*Journal of the American College of Cardiology(JACC)*  *JACC: Cardiovascular Interventions*  *JACC: Cardiovascular Imaging*  *JACC: Heart Failure*  *JACC: Clinical Electrophysiology*

Article entitled: Importance of Angina in Patients with Left Ventricular Systolic Dysfunction and Coronary Artery Disease: Insights from the STICH Trial

Manuscript number: JACC052615-1764

Corresponding Author: Dr. Jolicoeur

Corresponding author's printed name: E. Marc Jolicoeur

**\*Corresponding Author's Responsibility**

To avoid delay in the publication of your manuscript, **complete and submit this form as quickly as possible.**

After you have submitted your electronic form, you will receive an email confirmation that includes a PDF copy. Please print and retain for your files. **If for some reason you are unable to complete this form electronically**, please contact the JACC office directly or print this form, fill in the spaces manually, and email, fax, or post mail a copy to:

*Journal of the American College of Cardiology(JACC)*

*JACC: Cardiovascular Interventions*

*JACC: Cardiovascular Imaging*

*JACC: Heart Failure*

Heart House, 2400 N Street NW, Washington, DC, 20037

Fax: (202) 375-6819

Email: [jaccsd@acc.org](mailto:jaccsd@acc.org) [jaccint@acc.org](mailto:jaccint@acc.org) [jaccimg@acc.org](mailto:jaccimg@acc.org) [jacchf@acc.org](mailto:jacchf@acc.org)

Complete the section below, type your name into the Type Name box and input the date. *By submitting this form, you attest to being an author on the paper.*

Type Name: Marc Jolicoeur Date: June 30 2015

Title and Company (if employer representative):

I have **no relationship with industry** to disclose.

I have **no financial information** to disclose.

local\_p\_id: 290076

time: 1435709475

ip address: 142.85.5.31



AMERICAN COLLEGE OF CARDIOLOGY FOUNDATION  
AUTHOR RESPONSIBILITIES: RELATIONSHIP WITH INDUSTRY AND FINANCIAL DISCLOSURE

In addition to disclosing relationship with industry and/or financial disclosures on the *cover letter* and *title* page of your manuscript, we ask that each author sign this form.

**To be published in the following journal (please check):**

*Journal of the American College of Cardiology(JACC)*  *JACC: Cardiovascular Interventions*  *JACC: Cardiovascular Imaging*  *JACC: Heart Failure*  *JACC: Clinical Electrophysiology*

Article entitled: Importance of Angina in Patients with Left Ventricular Systolic Dysfunction and Coronary Artery Disease: Insights from the STICH Trial

Manuscript number: JACC052615-1764

Corresponding Author: Dr. Jolicoeur

Corresponding author's printed name: Dr.Jolicoeur

**\*Corresponding Author's Responsibility**

To avoid delay in the publication of your manuscript, **complete and submit this form as quickly as possible.**

After you have submitted your electronic form, you will receive an email confirmation that includes a PDF copy. Please print and retain for your files. **If for some reason you are unable to complete this form electronically**, please contact the JACC office directly or print this form, fill in the spaces manually, and email, fax, or post mail a copy to:

*Journal of the American College of Cardiology(JACC)*

*JACC: Cardiovascular Interventions*

*JACC: Cardiovascular Imaging*

*JACC: Heart Failure*

Heart House, 2400 N Street NW, Washington, DC, 20037

Fax: (202) 375-6819

Email: [jaccsd@acc.org](mailto:jaccsd@acc.org) [jaccint@acc.org](mailto:jaccint@acc.org) [jaccimg@acc.org](mailto:jaccimg@acc.org) [jacchf@acc.org](mailto:jacchf@acc.org)

Complete the section below, type your name into the Type Name box and input the date. *By submitting this form, you attest to being an author on the paper.*

Type Name: Allison M Dunning Date: 07/14/2015

Title and Company (if employer representative):

I have **no relationship with industry** to disclose.

I have **no financial information** to disclose.

local\_p\_id: 370014

time: 1436874091

ip address: 152.16.52.117



AMERICAN COLLEGE OF CARDIOLOGY FOUNDATION  
AUTHOR RESPONSIBILITIES: RELATIONSHIP WITH INDUSTRY AND FINANCIAL DISCLOSURE

In addition to disclosing relationship with industry and/or financial disclosures on the *cover letter* and *title* page of your manuscript, we ask that each author sign this form.

**To be published in the following journal (please check):**

*Journal of the American College of Cardiology(JACC)*  *JACC: Cardiovascular Interventions*  *JACC: Cardiovascular Imaging*  *JACC: Heart Failure*  *JACC: Clinical Electrophysiology*

Article entitled: Importance of Angina in Patients with Left Ventricular Systolic Dysfunction and Coronary Artery Disease: Insights from the STICH Trial

Manuscript number: JACC052615-1764

Corresponding Author: Dr. Jolicoeur

Corresponding author's printed name: Dr. Jolicoeur

**\*Corresponding Author's Responsibility**

To avoid delay in the publication of your manuscript, **complete and submit this form as quickly as possible.**

After you have submitted your electronic form, you will receive an email confirmation that includes a PDF copy. Please print and retain for your files. **If for some reason you are unable to complete this form electronically**, please contact the JACC office directly or print this form, fill in the spaces manually, and email, fax, or post mail a copy to:

*Journal of the American College of Cardiology(JACC)*

*JACC: Cardiovascular Interventions*

*JACC: Cardiovascular Imaging*

*JACC: Heart Failure*

Heart House, 2400 N Street NW, Washington, DC, 20037

Fax: (202) 375-6819

Email: [jaccsd@acc.org](mailto:jaccsd@acc.org) [jaccint@acc.org](mailto:jaccint@acc.org) [jaccimg@acc.org](mailto:jaccimg@acc.org) [jacchf@acc.org](mailto:jacchf@acc.org)

Complete the section below, type your name into the Type Name box and input the date. *By submitting this form, you attest to being an author on the paper.*

Type Name: Serenella Castelvechio Date: July 1 2015

Title and Company (if employer representative):

I have **no relationship with industry** to disclose.

I have **no financial information** to disclose.

local\_p\_id: 239265

time: 1435742148

ip address: 93.62.240.148



AMERICAN COLLEGE OF CARDIOLOGY FOUNDATION  
AUTHOR RESPONSIBILITIES: RELATIONSHIP WITH INDUSTRY AND FINANCIAL DISCLOSURE

In addition to disclosing relationship with industry and/or financial disclosures on the *cover letter* and *title* page of your manuscript, we ask that each author sign this form.

**To be published in the following journal (please check):**

*Journal of the American College of Cardiology(JACC)*  *JACC: Cardiovascular Interventions*  *JACC: Cardiovascular Imaging*  *JACC: Heart Failure*  *JACC: Clinical Electrophysiology*

Article entitled: Importance of Angina in Patients with Left Ventricular Systolic Dysfunction and Coronary Artery Disease: Insights from the STICH Trial

Manuscript number: JACC052615-1764

Corresponding Author: Dr. Jolicoeur

Corresponding author's printed name: E. MARC JOLICOEUR

**\*Corresponding Author's Responsibility**

To avoid delay in the publication of your manuscript, **complete and submit this form as quickly as possible.**

After you have submitted your electronic form, you will receive an email confirmation that includes a PDF copy. Please print and retain for your files. **If for some reason you are unable to complete this form electronically**, please contact the JACC office directly or print this form, fill in the spaces manually, and email, fax, or post mail a copy to:

*Journal of the American College of Cardiology(JACC)*

*JACC: Cardiovascular Interventions*

*JACC: Cardiovascular Imaging*

*JACC: Heart Failure*

Heart House, 2400 N Street NW, Washington, DC, 20037

Fax: (202) 375-6819

Email: [jaccsd@acc.org](mailto:jaccsd@acc.org) [jaccint@acc.org](mailto:jaccint@acc.org) [jaccimg@acc.org](mailto:jaccimg@acc.org) [jacchf@acc.org](mailto:jacchf@acc.org)

Complete the section below, type your name into the Type Name box and input the date. *By submitting this form, you attest to being an author on the paper.*

Type Name: Rafal Dabrowski Date: 1 Jul 2015

Title and Company (if employer representative): MD, PhD

I have **no relationship with industry** to disclose.

I have **no financial information** to disclose.

local\_p\_id: 244567

time: 1435784441

ip address: 95.49.178.36





AMERICAN COLLEGE OF CARDIOLOGY FOUNDATION  
AUTHOR RESPONSIBILITIES: RELATIONSHIP WITH INDUSTRY AND FINANCIAL DISCLOSURE

In addition to disclosing relationship with industry and/or financial disclosures on the *cover letter* and *title* page of your manuscript, we ask that each author sign this form.

**To be published in the following journal (please check):**

*Journal of the American College of Cardiology(JACC)*  *JACC: Cardiovascular Interventions*  *JACC: Cardiovascular Imaging*  *JACC: Heart Failure*  *JACC: Clinical Electrophysiology*

Article entitled: Importance of Angina in Patients with Left Ventricular Systolic Dysfunction and Coronary Artery Disease: Insights from the STICH Trial

Manuscript number: JACC052615-1764

Corresponding Author: Dr. Jolicoeur

Corresponding author's printed name: Dr. Jolicoeur

**\*Corresponding Author's Responsibility**

To avoid delay in the publication of your manuscript, **complete and submit this form as quickly as possible.**

After you have submitted your electronic form, you will receive an email confirmation that includes a PDF copy. Please print and retain for your files. **If for some reason you are unable to complete this form electronically**, please contact the JACC office directly or print this form, fill in the spaces manually, and email, fax, or post mail a copy to:

*Journal of the American College of Cardiology(JACC)*  
*JACC: Cardiovascular Interventions*  
*JACC: Cardiovascular Imaging*  
*JACC: Heart Failure*  
Heart House, 2400 N Street NW, Washington, DC, 20037  
Fax: (202) 375-6819  
Email: [jaccsd@acc.org](mailto:jaccsd@acc.org) [jaccint@acc.org](mailto:jaccint@acc.org) [jaccimg@acc.org](mailto:jaccimg@acc.org) [jacchf@acc.org](mailto:jacchf@acc.org)

Complete the section below, type your name into the Type Name box and input the date. *By submitting this form, you attest to being an author on the paper.*

Type Name: Myron A. Waclawiw Date: 07/01/2015

Title and Company (if employer representative):

I have **no relationship with industry** to disclose.

I have **no financial information** to disclose.

local\_p\_id: 380156

time: 1435764825

ip address: 128.231.237.5



AMERICAN COLLEGE OF CARDIOLOGY FOUNDATION  
AUTHOR RESPONSIBILITIES: RELATIONSHIP WITH INDUSTRY AND FINANCIAL DISCLOSURE

In addition to disclosing relationship with industry and/or financial disclosures on the *cover letter* and *title* page of your manuscript, we ask that each author sign this form.

**To be published in the following journal (please check):**

*Journal of the American College of Cardiology(JACC)*  *JACC: Cardiovascular Interventions*  *JACC: Cardiovascular Imaging*  *JACC: Heart Failure*  *JACC: Clinical Electrophysiology*

Article entitled: Importance of Angina in Patients with Left Ventricular Systolic Dysfunction and Coronary Artery Disease: Insights from the STICH Trial

Manuscript number: JACC052615-1764

Corresponding Author: Dr. Jolicoeur

Corresponding author's printed name: Jolicoeur

**\*Corresponding Author's Responsibility**

To avoid delay in the publication of your manuscript, **complete and submit this form as quickly as possible.**

After you have submitted your electronic form, you will receive an email confirmation that includes a PDF copy. Please print and retain for your files. **If for some reason you are unable to complete this form electronically**, please contact the JACC office directly or print this form, fill in the spaces manually, and email, fax, or post mail a copy to:

*Journal of the American College of Cardiology(JACC)*

*JACC: Cardiovascular Interventions*

*JACC: Cardiovascular Imaging*

*JACC: Heart Failure*

Heart House, 2400 N Street NW, Washington, DC, 20037

Fax: (202) 375-6819

Email: [jaccsd@acc.org](mailto:jaccsd@acc.org) [jaccint@acc.org](mailto:jaccint@acc.org) [jaccimg@acc.org](mailto:jaccimg@acc.org) [jacchf@acc.org](mailto:jacchf@acc.org)

Complete the section below, type your name into the Type Name box and input the date. *By submitting this form, you attest to being an author on the paper.*

Type Name: Mark C Petrie Date: 30 June 2015

Title and Company (if employer representative): Jolicoeur

I have **no relationship with industry** to disclose.

I have **no financial information** to disclose.

local\_p\_id: 50117

time: 1435703986

ip address: 80.1.53.7



AMERICAN COLLEGE OF CARDIOLOGY FOUNDATION  
AUTHOR RESPONSIBILITIES: RELATIONSHIP WITH INDUSTRY AND FINANCIAL DISCLOSURE

In addition to disclosing relationship with industry and/or financial disclosures on the *cover letter* and *title* page of your manuscript, we ask that each author sign this form.

**To be published in the following journal (please check):**

*Journal of the American College of Cardiology(JACC)*  *JACC: Cardiovascular Interventions*  *JACC: Cardiovascular Imaging*  *JACC: Heart Failure*  *JACC: Clinical Electrophysiology*

Article entitled: Importance of Angina in Patients with Left Ventricular Systolic Dysfunction and Coronary Artery Disease: Insights from the STICH Trial

Manuscript number: JACC052615-1764

Corresponding Author: Dr. Jolicoeur

Corresponding author's printed name: Marc Jolicoeur

**\*Corresponding Author's Responsibility**

To avoid delay in the publication of your manuscript, **complete and submit this form as quickly as possible.**

After you have submitted your electronic form, you will receive an email confirmation that includes a PDF copy. Please print and retain for your files. **If for some reason you are unable to complete this form electronically**, please contact the JACC office directly or print this form, fill in the spaces manually, and email, fax, or post mail a copy to:

*Journal of the American College of Cardiology(JACC)*

*JACC: Cardiovascular Interventions*

*JACC: Cardiovascular Imaging*

*JACC: Heart Failure*

Heart House, 2400 N Street NW, Washington, DC, 20037

Fax: (202) 375-6819

Email: [jaccsd@acc.org](mailto:jaccsd@acc.org) [jaccint@acc.org](mailto:jaccint@acc.org) [jaccimg@acc.org](mailto:jaccimg@acc.org) [jacchf@acc.org](mailto:jacchf@acc.org)

Complete the section below, type your name into the Type Name box and input the date. *By submitting this form, you attest to being an author on the paper.*

Type Name: Ralph Stewart Date: 1 July 2015

Title and Company (if employer representative):

I have **no relationship with industry** to disclose.

I have **no financial information** to disclose.

local\_p\_id: 53911

time: 1435705791

ip address: 210.55.20.106



AMERICAN COLLEGE OF CARDIOLOGY FOUNDATION  
AUTHOR RESPONSIBILITIES: RELATIONSHIP WITH INDUSTRY AND FINANCIAL DISCLOSURE

In addition to disclosing relationship with industry and/or financial disclosures on the *cover letter* and *title* page of your manuscript, we ask that each author sign this form.

**To be published in the following journal (please check):**

*Journal of the American College of Cardiology(JACC)*  *JACC: Cardiovascular Interventions*  *JACC: Cardiovascular Imaging*  *JACC: Heart Failure*  *JACC: Clinical Electrophysiology*

Article entitled: Importance of Angina in Patients with Left Ventricular Systolic Dysfunction and Coronary Artery Disease: Insights from the STICH Trial

Manuscript number: JACC052615-1764

Corresponding Author: Dr. Jolicoeur

Corresponding author's printed name: Marc Jolicoeur

**\*Corresponding Author's Responsibility**

To avoid delay in the publication of your manuscript, **complete and submit this form as quickly as possible.**

After you have submitted your electronic form, you will receive an email confirmation that includes a PDF copy. Please print and retain for your files. **If for some reason you are unable to complete this form electronically**, please contact the JACC office directly or print this form, fill in the spaces manually, and email, fax, or post mail a copy to:

*Journal of the American College of Cardiology(JACC)*  
*JACC: Cardiovascular Interventions*  
*JACC: Cardiovascular Imaging*  
*JACC: Heart Failure*  
Heart House, 2400 N Street NW, Washington, DC, 20037  
Fax: (202) 375-6819  
Email: [jaccsd@acc.org](mailto:jaccsd@acc.org) [jaccint@acc.org](mailto:jaccint@acc.org) [jaccimg@acc.org](mailto:jaccimg@acc.org) [jacchf@acc.org](mailto:jacchf@acc.org)

Complete the section below, type your name into the Type Name box and input the date. *By submitting this form, you attest to being an author on the paper.*

Type Name: Pardeep Jhund Date: 30 June 2015

Title and Company (if employer representative):

I have **no relationship with industry** to disclose.

I have **no financial information** to disclose.

local\_p\_id: 57911

time: 1435704042

ip address: 31.98.85.187



AMERICAN COLLEGE OF CARDIOLOGY FOUNDATION  
AUTHOR RESPONSIBILITIES: RELATIONSHIP WITH INDUSTRY AND FINANCIAL DISCLOSURE

In addition to disclosing relationship with industry and/or financial disclosures on the *cover letter* and *title* page of your manuscript, we ask that each author sign this form.

**To be published in the following journal (please check):**

*Journal of the American College of Cardiology(JACC)*  *JACC: Cardiovascular Interventions*  *JACC: Cardiovascular Imaging*  *JACC: Heart Failure*  *JACC: Clinical Electrophysiology*

Article entitled: Importance of Angina in Patients with Left Ventricular Systolic Dysfunction and Coronary Artery Disease: Insights from the STICH Trial

Manuscript number: JACC052615-1764

Corresponding Author: Dr. Jolicoeur

Corresponding author's printed name: E. Marc Jolicoeur, M.D.

**\*Corresponding Author's Responsibility**

To avoid delay in the publication of your manuscript, **complete and submit this form as quickly as possible.**

After you have submitted your electronic form, you will receive an email confirmation that includes a PDF copy. Please print and retain for your files. **If for some reason you are unable to complete this form electronically**, please contact the JACC office directly or print this form, fill in the spaces manually, and email, fax, or post mail a copy to:

*Journal of the American College of Cardiology(JACC)*

*JACC: Cardiovascular Interventions*

*JACC: Cardiovascular Imaging*

*JACC: Heart Failure*

Heart House, 2400 N Street NW, Washington, DC, 20037

Fax: (202) 375-6819

Email: [jaccsd@acc.org](mailto:jaccsd@acc.org) [jaccint@acc.org](mailto:jaccint@acc.org) [jaccimg@acc.org](mailto:jaccimg@acc.org) [jacchf@acc.org](mailto:jacchf@acc.org)

Complete the section below, type your name into the Type Name box and input the date. *By submitting this form, you attest to being an author on the paper.*

Type Name: Patrice Desvigne-Nickens, M.D. Date: July 1, 2015

Title and Company (if employer representative): National heart, Lung, and Blood Institute

I have **no relationship with industry** to disclose.

I have **no financial information** to disclose.

local\_p\_id: 356922

time: 1435767065

ip address: 128.231.237.8



AMERICAN COLLEGE OF CARDIOLOGY FOUNDATION  
AUTHOR RESPONSIBILITIES: RELATIONSHIP WITH INDUSTRY AND FINANCIAL DISCLOSURE

In addition to disclosing relationship with industry and/or financial disclosures on the *cover letter* and *title* page of your manuscript, we ask that each author sign this form.

**To be published in the following journal (please check):**

*Journal of the American College of Cardiology(JACC)*  *JACC: Cardiovascular Interventions*  *JACC: Cardiovascular Imaging*  *JACC: Heart Failure*  *JACC: Clinical Electrophysiology*

Article entitled: Importance of Angina in Patients with Left Ventricular Systolic Dysfunction and Coronary Artery Disease: Insights from the STICH Trial

Manuscript number: JACC052615-1764

Corresponding Author: Dr. Jolicoeur

Corresponding author's printed name: John Cleland

**\*Corresponding Author's Responsibility**

To avoid delay in the publication of your manuscript, **complete and submit this form as quickly as possible.**

After you have submitted your electronic form, you will receive an email confirmation that includes a PDF copy. Please print and retain for your files. **If for some reason you are unable to complete this form electronically**, please contact the JACC office directly or print this form, fill in the spaces manually, and email, fax, or post mail a copy to:

*Journal of the American College of Cardiology(JACC)*  
*JACC: Cardiovascular Interventions*  
*JACC: Cardiovascular Imaging*  
*JACC: Heart Failure*  
Heart House, 2400 N Street NW, Washington, DC, 20037  
Fax: (202) 375-6819  
Email: [jaccsd@acc.org](mailto:jaccsd@acc.org) [jaccint@acc.org](mailto:jaccint@acc.org) [jaccimg@acc.org](mailto:jaccimg@acc.org) [jacchf@acc.org](mailto:jacchf@acc.org)

Complete the section below, type your name into the Type Name box and input the date. *By submitting this form, you attest to being an author on the paper.*

Type Name: Robert O. Bonow Date: July 1, 2015

Title and Company (if employer representative):

I have **no relationship with industry** to disclose.

I have **no financial information** to disclose.

local\_p\_id: 157

time: 1435757634

ip address: 165.20.108.40



AMERICAN COLLEGE OF CARDIOLOGY FOUNDATION  
AUTHOR RESPONSIBILITIES: RELATIONSHIP WITH INDUSTRY AND FINANCIAL DISCLOSURE

In addition to disclosing relationship with industry and/or financial disclosures on the *cover letter* and *title* page of your manuscript, we ask that each author sign this form.

**To be published in the following journal (please check):**

*Journal of the American College of Cardiology(JACC)*  *JACC: Cardiovascular Interventions*  *JACC: Cardiovascular Imaging*  *JACC: Heart Failure*  *JACC: Clinical Electrophysiology*

Article entitled: Importance of Angina in Patients with Left Ventricular Systolic Dysfunction and Coronary Artery Disease: Insights from the STICH Trial

Manuscript number: JACC052615-1764

Corresponding Author: Dr. Jolicoeur

Corresponding author's printed name: E. Marc Jolicoeur

**\*Corresponding Author's Responsibility**

To avoid delay in the publication of your manuscript, **complete and submit this form as quickly as possible.**

After you have submitted your electronic form, you will receive an email confirmation that includes a PDF copy. Please print and retain for your files. **If for some reason you are unable to complete this form electronically**, please contact the JACC office directly or print this form, fill in the spaces manually, and email, fax, or post mail a copy to:

*Journal of the American College of Cardiology(JACC)*

*JACC: Cardiovascular Interventions*

*JACC: Cardiovascular Imaging*

*JACC: Heart Failure*

Heart House, 2400 N Street NW, Washington, DC, 20037

Fax: (202) 375-6819

Email: [jaccsd@acc.org](mailto:jaccsd@acc.org) [jaccint@acc.org](mailto:jaccint@acc.org) [jaccimg@acc.org](mailto:jaccimg@acc.org) [jacchf@acc.org](mailto:jacchf@acc.org)

Complete the section below, type your name into the Type Name box and input the date. *By submitting this form, you attest to being an author on the paper.*

Type Name: Julio A. Panza Date: July 6, 2015

Title and Company (if employer representative): Chief of Cardiology, Westchester Medical Center

I have **no relationship with industry** to disclose.

I have **no financial information** to disclose.

local\_p\_id: 363381

time: 1436188258

ip address: 167.206.63.162



AMERICAN COLLEGE OF CARDIOLOGY FOUNDATION  
AUTHOR RESPONSIBILITIES: RELATIONSHIP WITH INDUSTRY AND FINANCIAL DISCLOSURE

In addition to disclosing relationship with industry and/or financial disclosures on the *cover letter* and *title* page of your manuscript, we ask that each author sign this form.

**To be published in the following journal (please check):**

*Journal of the American College of Cardiology(JACC)*  *JACC: Cardiovascular Interventions*  *JACC: Cardiovascular Imaging*  *JACC: Heart Failure*  *JACC: Clinical Electrophysiology*

Article entitled: Importance of Angina in Patients with Left Ventricular Systolic Dysfunction and Coronary Artery Disease: Insights from the STICH Trial

Manuscript number: JACC052615-1764

Corresponding Author: Dr. Jolicoeur

Corresponding author's printed name: Marc Jolicoeur

**\*Corresponding Author's Responsibility**

To avoid delay in the publication of your manuscript, **complete and submit this form as quickly as possible.**

After you have submitted your electronic form, you will receive an email confirmation that includes a PDF copy. Please print and retain for your files. **If for some reason you are unable to complete this form electronically**, please contact the JACC office directly or print this form, fill in the spaces manually, and email, fax, or post mail a copy to:

*Journal of the American College of Cardiology(JACC)*  
*JACC: Cardiovascular Interventions*  
*JACC: Cardiovascular Imaging*  
*JACC: Heart Failure*  
Heart House, 2400 N Street NW, Washington, DC, 20037  
Fax: (202) 375-6819  
Email: [jaccsd@acc.org](mailto:jaccsd@acc.org) [jaccint@acc.org](mailto:jaccint@acc.org) [jaccimg@acc.org](mailto:jaccimg@acc.org) [jacchf@acc.org](mailto:jacchf@acc.org)

Complete the section below, type your name into the Type Name box and input the date. *By submitting this form, you attest to being an author on the paper.*

Type Name: Benjamin Sun Date: July 1, 2015

Title and Company (if employer representative): Minneapolis Heart Institute

I have **relationship with industry** to disclose.

1. Type **relationship with industry** to disclose: Sunshine Heart

I have **no financial information** to disclose.

local\_p\_id: 298410

time: 1435760796

ip address: 167.177.40.42





AMERICAN COLLEGE OF CARDIOLOGY FOUNDATION  
AUTHOR RESPONSIBILITIES: RELATIONSHIP WITH INDUSTRY AND FINANCIAL DISCLOSURE

In addition to disclosing relationship with industry and/or financial disclosures on the *cover letter* and *title* page of your manuscript, we ask that each author sign this form.

**To be published in the following journal (please check):**

*Journal of the American College of Cardiology(JACC)*  *JACC: Cardiovascular Interventions*  *JACC: Cardiovascular Imaging*  *JACC: Heart Failure*  *JACC: Clinical Electrophysiology*

Article entitled: Importance of Angina in Patients with Left Ventricular Systolic Dysfunction and Coronary Artery Disease: Insights from the STICH Trial

Manuscript number: JACC052615-1764

Corresponding Author: Dr. Jolicoeur

Corresponding author's printed name: Dr. Jolicoeur

**\*Corresponding Author's Responsibility**

To avoid delay in the publication of your manuscript, **complete and submit this form as quickly as possible.**

After you have submitted your electronic form, you will receive an email confirmation that includes a PDF copy. Please print and retain for your files. **If for some reason you are unable to complete this form electronically**, please contact the JACC office directly or print this form, fill in the spaces manually, and email, fax, or post mail a copy to:

*Journal of the American College of Cardiology(JACC)*

*JACC: Cardiovascular Interventions*

*JACC: Cardiovascular Imaging*

*JACC: Heart Failure*

Heart House, 2400 N Street NW, Washington, DC, 20037

Fax: (202) 375-6819

Email: [jaccsd@acc.org](mailto:jaccsd@acc.org) [jaccint@acc.org](mailto:jaccint@acc.org) [jaccimg@acc.org](mailto:jaccimg@acc.org) [jacchf@acc.org](mailto:jacchf@acc.org)

Complete the section below, type your name into the Type Name box and input the date. *By submitting this form, you attest to being an author on the paper.*

Type Name: Tan Ru San Date: 1 July 2015

Title and Company (if employer representative): MD

I have **no relationship with industry** to disclose.

I have **no financial information** to disclose.

local\_p\_id: 394723

time: 1435716785

ip address: 49.77.28.231



AMERICAN COLLEGE OF CARDIOLOGY FOUNDATION  
AUTHOR RESPONSIBILITIES: RELATIONSHIP WITH INDUSTRY AND FINANCIAL DISCLOSURE

In addition to disclosing relationship with industry and/or financial disclosures on the *cover letter* and *title* page of your manuscript, we ask that each author sign this form.

**To be published in the following journal (please check):**

*Journal of the American College of Cardiology(JACC)*  *JACC: Cardiovascular Interventions*  *JACC: Cardiovascular Imaging*  *JACC: Heart Failure*  *JACC: Clinical Electrophysiology*

Article entitled: Importance of Angina in Patients with Left Ventricular Systolic Dysfunction and Coronary Artery Disease: Insights from the STICH Trial

Manuscript number: JACC052615-1764

Corresponding Author: Dr. Jolicoeur

Corresponding author's printed name: Marc Jolicoeur

**\*Corresponding Author's Responsibility**

To avoid delay in the publication of your manuscript, **complete and submit this form as quickly as possible.**

After you have submitted your electronic form, you will receive an email confirmation that includes a PDF copy. Please print and retain for your files. **If for some reason you are unable to complete this form electronically**, please contact the JACC office directly or print this form, fill in the spaces manually, and email, fax, or post mail a copy to:

*Journal of the American College of Cardiology(JACC)*

*JACC: Cardiovascular Interventions*

*JACC: Cardiovascular Imaging*

*JACC: Heart Failure*

Heart House, 2400 N Street NW, Washington, DC, 20037

Fax: (202) 375-6819

Email: [jaccsd@acc.org](mailto:jaccsd@acc.org) [jaccint@acc.org](mailto:jaccint@acc.org) [jaccimg@acc.org](mailto:jaccimg@acc.org) [jacchf@acc.org](mailto:jacchf@acc.org)

Complete the section below, type your name into the Type Name box and input the date. *By submitting this form, you attest to being an author on the paper.*

Type Name: Hussein Al-Khalidi Date: June 30, 2015

Title and Company (if employer representative): Associate Professor, Duke University

I have **no relationship with industry** to disclose.

I have **no financial information** to disclose.

local\_p\_id: 297955

time: 1435704344

ip address: 152.16.52.120



AMERICAN COLLEGE OF CARDIOLOGY FOUNDATION  
AUTHOR RESPONSIBILITIES: RELATIONSHIP WITH INDUSTRY AND FINANCIAL DISCLOSURE

In addition to disclosing relationship with industry and/or financial disclosures on the *cover letter* and *title* page of your manuscript, we ask that each author sign this form.

**To be published in the following journal (please check):**

*Journal of the American College of Cardiology(JACC)*  *JACC: Cardiovascular Interventions*  *JACC: Cardiovascular Imaging*  *JACC: Heart Failure*  *JACC: Clinical Electrophysiology*

Article entitled: Importance of Angina in Patients with Left Ventricular Systolic Dysfunction and Coronary Artery Disease: Insights from the STICH Trial

Manuscript number: JACC052615-1764

Corresponding Author: Dr. Jolicoeur

Corresponding author's printed name: Dr. Jolicoeur

**\*Corresponding Author's Responsibility**

To avoid delay in the publication of your manuscript, **complete and submit this form as quickly as possible.**

After you have submitted your electronic form, you will receive an email confirmation that includes a PDF copy. Please print and retain for your files. **If for some reason you are unable to complete this form electronically**, please contact the JACC office directly or print this form, fill in the spaces manually, and email, fax, or post mail a copy to:

*Journal of the American College of Cardiology(JACC)*  
*JACC: Cardiovascular Interventions*  
*JACC: Cardiovascular Imaging*  
*JACC: Heart Failure*  
Heart House, 2400 N Street NW, Washington, DC, 20037  
Fax: (202) 375-6819  
Email: [jaccsd@acc.org](mailto:jaccsd@acc.org) [jaccint@acc.org](mailto:jaccint@acc.org) [jaccimg@acc.org](mailto:jaccimg@acc.org) [jacchf@acc.org](mailto:jacchf@acc.org)

Complete the section below, type your name into the Type Name box and input the date. *By submitting this form, you attest to being an author on the paper.*

Type Name: Jean L. Rouleau Date: 2015/07/01

Title and Company (if employer representative):

I have **no relationship with industry** to disclose.

I have **no financial information** to disclose.

local\_p\_id: 5372

time: 1435762641

ip address: 142.85.5.31



AMERICAN COLLEGE OF CARDIOLOGY FOUNDATION  
AUTHOR RESPONSIBILITIES: RELATIONSHIP WITH INDUSTRY AND FINANCIAL DISCLOSURE

In addition to disclosing relationship with industry and/or financial disclosures on the *cover letter* and *title* page of your manuscript, we ask that each author sign this form.

**To be published in the following journal (please check):**

*Journal of the American College of Cardiology(JACC)*  *JACC: Cardiovascular Interventions*  *JACC: Cardiovascular Imaging*  *JACC: Heart Failure*  *JACC: Clinical Electrophysiology*

Article entitled: Importance of Angina in Patients with Left Ventricular Systolic Dysfunction and Coronary Artery Disease: Insights from the STICH Trial

Manuscript number: JACC052615-1764

Corresponding Author: Dr. Jolicoeur

Corresponding author's printed name: Dr. Marc Jolicoeur

**\*Corresponding Author's Responsibility**

To avoid delay in the publication of your manuscript, **complete and submit this form as quickly as possible.**

After you have submitted your electronic form, you will receive an email confirmation that includes a PDF copy. Please print and retain for your files. **If for some reason you are unable to complete this form electronically**, please contact the JACC office directly or print this form, fill in the spaces manually, and email, fax, or post mail a copy to:

*Journal of the American College of Cardiology(JACC)*  
*JACC: Cardiovascular Interventions*  
*JACC: Cardiovascular Imaging*  
*JACC: Heart Failure*  
Heart House, 2400 N Street NW, Washington, DC, 20037  
Fax: (202) 375-6819  
Email: [jaccsd@acc.org](mailto:jaccsd@acc.org) [jaccint@acc.org](mailto:jaccint@acc.org) [jaccimg@acc.org](mailto:jaccimg@acc.org) [jacchf@acc.org](mailto:jacchf@acc.org)

Complete the section below, type your name into the Type Name box and input the date. *By submitting this form, you attest to being an author on the paper.*

Type Name: Eric J. Velazquez Date: July 14 2015

Title and Company (if employer representative):

I have **relationship with industry** to disclose.

1. Type **relationship with industry** to disclose: Novartis - Advisory Committee, Speaker's Bureau
2. Type **relationship with industry** to disclose: Alynlyam - Research Grant
3. Type **relationship with industry** to disclose: GSK - Research Grant
4. Type **relationship with industry** to disclose: Merck - Advisory Committee
5. Type **relationship with industry** to disclose: NHLBI - Research Funding

I have **no financial information** to disclose.

local\_p\_id: 175303

time: 1436891151

ip address: 152.16.52.126

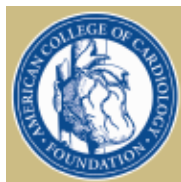

**AMERICAN COLLEGE OF CARDIOLOGY FOUNDATION  
CORRESPONDING AUTHOR RESPONSIBILITY AND COPYRIGHT TRANSFER  
AGREEMENT**

**Journal** Journal of the American College of Cardiology

**Manuscript #** JACC052615-1764R

**Title** Importance of Angina in Patients with Left Ventricular Systolic Dysfunction and Coronary Artery Disease: Insights from the STICH Trial

**Authors** Marc Jolicoeur, Allison Dunning, Serenella Castelvechio, Rafal Dabrowski, Myron Waclawiw, Mark Petrie, Ralph Stewart, Pardeep Jhund, Patrice Desvigne-Nickens, Robert Bonow, Julio Panza, Benjamin Sun, Tan Ru San, Hussein Al-Khalidi, Jean Rouleau, Eric Velazquez, and John Cleland

**Date** August 21, 2015 10:43 GMT

**IP Address** 150.237.247.15

Journal publishers and authors share a common interest in the protection of copyright: authors principally because they want their creative works to be protected from plagiarism and other unlawful uses, publishers because they need to protect their work and investment in the production, marketing and distribution of the published version of the article. In order to do so effectively, publishers request a formal written transfer of copyright from the author(s) for each article published. Publishers and authors are also concerned that the integrity of the official record of publication of an article (once refereed and published) be maintained, and in order to protect that reference value and validation process, we ask that authors recognize that distribution (including through the Internet/WWW or other on-line means) of the authoritative version of the article as published is best administered by the Publisher.

To avoid any delay in the publication of your image, please read the terms of this agreement, complete all required information, and electronically submit your form as quickly as possible.

**\*For corresponding author only**

- I will obtain written permission from all individuals who are listed in the Acknowledgment section of the manuscript because readers may infer their endorsement of data and conclusions.  
(**Acknowledgments no longer need to be sent to the Editorial Office.**)

I certify that:

1. All persons who have made substantial contributions in the manuscript (e.g., data collection, analysis, or writing or editing assistance), but who do not fulfill authorship criteria, are named with their specific contributions in the Acknowledgment section of the manuscript;
2. All persons named in the Acknowledgment section have provided the corresponding author with written permission to be named in the manuscript; and
3. If an Acknowledgment section is not included, no other persons have made substantial contributions to the manuscript.

Corresponding Author's Name: John GF Cleland

**To be published in the following journal (please check):**

*Journal of the American College of Cardiology (JACC)*  *JACC: Cardiovascular Interventions*  *JACC: Cardiovascular Imaging*  *JACC: Heart Failure*

Article entitled: Importance of Angina in Patients with Left Ventricular Systolic Dysfunction and Coronary Artery Disease: Insights from the STICH Trial

Manuscript number: JACC052615-1764R

Corresponding author's printed name: Dr. Cleland

First author's printed name: Dr. Marc E Jolicoeur

I hereby assign to the American College of Cardiology Foundation the copyright in the manuscript identified above and any supplemental tables, illustrations or other information submitted therewith (the "article") in all forms and media (whether now known or hereafter developed), throughout the world, in all languages, for the full term of copyright and all extensions and renewals thereof, effective when and if the article is accepted for publication. This transfer includes the right to adapt the presentation of the article for use in conjunction with computer systems and programs, including reproduction or publication in machine-readable form and incorporation in electronic retrieval systems.

Authors retain or are hereby granted (without the need to obtain further permission) rights to use the article for traditional scholarship communications, for teaching, and for distribution within their institution, as set out in the General Terms of Publication (see note 1), and also agree to the other terms.

- I am the sole author of the manuscript
- I am one author signing on behalf of all co-authors of the manuscript
- The manuscript is a 'work made for hire' and I am signing as an authorized representative of the employing company
- I am a US Government employee and there is no copyright to transfer but I affirm the author warranties (see notes 3 & 4)
- I am a co-author who is not a US Government employee but whose co-authors are government employees (see note 4)
- I am an employee of the UK
- Canadian or Australian Government claiming Crown Copyright but I affirm the author warranties (see note 5)
- I am a co-author who is not claiming Crown Copyright but whose co-authors are employees of the UK
- Canadian or Australian Government (see note 5)

## FUNDING

- The underlying research reported in the article was funded by the US National Institute of Health**
- The underlying research reported in the article was performed by a Howard Hughes Medical Institute investigator**

Elsevier will automatically submit your paper to PubMed Central if the research was funded by the NIH (as indicated by checking the appropriate box above)

Please mark **one or more** of the above boxes (as appropriate) and then input your name and date.

Type Name: John GF Cleland

Title and Company (if employer representative):

Date: 21st August 2015

Data Protection: By submitting this form you are consenting that the personal information provided herein may be used by the American College of Cardiology Foundation, Elsevier, and its affiliated companies worldwide to contact you concerning the publishing of your article and occasionally for marketing purposes. We respect your privacy. If you **do** not wish to receive news, promotions and special offers about our products and services, then please mark this box. See also the Elsevier website at <http://www.elsevier.com> and click *Privacy Policy*.

Please complete this electronic file by filling out all required criteria and clicking the "Submit" button at the bottom of this page. You will receive a PDF version of your completed electronic form via email. Please print this copy and retain for your files.

*Journal of the American College of Cardiology(JACC)*  
*JACC: Cardiovascular Interventions*  
*JACC: Cardiovascular Imaging*  
JACC: Heart Failure Heart House, 2400 N Street NW, Washington, DC, 20037  
Fax: (202) 375-6819  
Email: jaccsd@acc.org  
jaccint@acc.org  
jaccimg@acc.org  
jacchf@acc.org

## **General Terms of Publication**

### **1. As an author you (or your employer or institution) may do the following:**

- make copies (print or electronic) of the article for your own personal use, including for your own classroom teaching use;
- make copies and distribute such copies (including through e-mail) of the article to research colleagues, for the personal use by such colleagues (but not commercially or systematically, e.g. via an e-mail list or list server);
- post a pre-print version of the article on Internet websites including electronic pre-print servers, and to retain indefinitely such version on such servers or sites;
- post a revised personal version of the final text of the article (to reflect changes made in the peer review and editing process) on your personal or institutional website or server, with a link to the journal homepage (on elsevier.com);
- present the article at a meeting or conference and to distribute copies of the article to the delegates attending such meeting;
- for your employer, if the article is a 'work for hire', made within the scope of your employment, your employer may use all or part of the information in the article for other intra-company use (e.g. training);
- retain patent and trademark rights and rights to any process or procedure described in the article;
- include the article in full or in part in a thesis or dissertation (provided that this is not to be published commercially);
- use the article or any part thereof in a printed compilation of your works, such as collected writings or lecture notes (subsequent to publication of the article in the journal); and
- prepare other derivative works, to extend the article into book-length form, or to otherwise re-use portions or excerpts in other works, with full acknowledgement of its original publication in the journal.

All copies, print or electronic, or other use of the paper or article must include the appropriate bibliographic citation for the article's publication in the journal.

#### **• Requests from third parties**

Requests for all uses not included above, including the authorization of third parties to reproduce or otherwise use all or part of the article (including figures and tables), should be referred to the Elsevier Global Rights Department by going to our website at <http://www.elsevier.com/locate/permissions> and selecting 'Permissions'.

#### **• Author warranties**

- The article you have submitted to the journal for review is original, has been written by the stated authors and has not been published elsewhere.

- The article is not currently being considered for publication by any other journal and will not be submitted for such review while under review by the journal.
- The article contains no libellous or other unlawful statements and does not contain any materials that violate any personal or proprietary rights of any other person or entity.
- You have obtained written permission from copyright owners for any excerpts from copyrighted works that are included and have credited the sources in your article.
- If the article was prepared jointly with other authors, you have informed the co-author(s) of the terms of this copyright transfer and that you are signing on their behalf as their agent, and represent that you are authorized to do so.

#### • US Government employees

- If all co-authors are US Government employees there is no copyright to transfer. Please sign the form, to confirm the author warranties.
- If there is a number of co-authors, of which at least one is a US Government employee (and this work was prepared in such capacity) and at least one is not a government employee, the non-government author should sign this form, indicating transfer of those rights which such author has (also on behalf of any other non-government co-authors).

#### • Crown Copyright

- UK Government employee authors may elect to transfer copyright.
- UK Government employees wishing to claim Crown Copyright should mark the appropriate box overleaf, sign the form to affirm the author warranties and attach the completed authorization form as per HMSO guidelines at <http://www.hmso.gov.uk/copyright/guidance/articles/htm>.
- The work of Canadian or Australian Government employees is automatically subject to Crown Copyright. Please mark the appropriate box and sign the form to affirm the author warranties.
- If there is a number of co-authors, of which at least one is claiming Crown Copyright and at least one is not an employee of the UK, Canadian or Australian Government, the non-government author should sign this form, indicating transfer of those rights which such author has (also on behalf of any other non-government co-authors).

#### • Elsevier's AiP (Articles in Press) service

Elsevier may choose to publish an abstract or portions of the paper before we publish it in the journal. Please contact our Production department immediately if you do not want us to make any such prior publication for any reason, including disclosure of a patentable invention.

**\*If you have checked a box indicating that you are NOT signing on behalf of all co-authors on the manuscript, the Editorial Office will be in contact to collect the remaining signatures. If you checked the box indicating that you are signing on behalf of all co-authors, please complete this form and submit. Nothing further will be needed.**

- I am not signing on behalf of all co-authors of the manuscript.
- I am one author signing on behalf of all co-authors of the manuscript.

**Name(printed):** John GF Cleland  
**Title (if employer representative):**  
**Date:** 21st August 2015

local\_p\_id: 1340

time: 1440153968

ip address: 150.237.247.15





AMERICAN COLLEGE OF CARDIOLOGY FOUNDATION  
AUTHOR RESPONSIBILITIES: RELATIONSHIP WITH INDUSTRY AND FINANCIAL DISCLOSURE

In addition to disclosing relationship with industry and/or financial disclosures on the *cover letter* and *title* page of your manuscript, we ask that each author sign this form.

**To be published in the following journal (please check):**

*Journal of the American College of Cardiology(JACC)*  *JACC: Cardiovascular Interventions*  *JACC: Cardiovascular Imaging*  *JACC: Heart Failure*  *JACC: Clinical Electrophysiology*

Article entitled: Importance of Angina in Patients with Left Ventricular Systolic Dysfunction and Coronary Artery Disease: Insights from the STICH Trial

Manuscript number: JACC052615-1764

Corresponding Author: Dr. Jolicoeur

Corresponding author's printed name: Marc Jolicoeur

**\*Corresponding Author's Responsibility**

To avoid delay in the publication of your manuscript, **complete and submit this form as quickly as possible.**

After you have submitted your electronic form, you will receive an email confirmation that includes a PDF copy. Please print and retain for your files. **If for some reason you are unable to complete this form electronically**, please contact the JACC office directly or print this form, fill in the spaces manually, and email, fax, or post mail a copy to:

*Journal of the American College of Cardiology(JACC)*  
*JACC: Cardiovascular Interventions*  
*JACC: Cardiovascular Imaging*  
*JACC: Heart Failure*  
Heart House, 2400 N Street NW, Washington, DC, 20037  
Fax: (202) 375-6819  
Email: [jaccsd@acc.org](mailto:jaccsd@acc.org) [jaccint@acc.org](mailto:jaccint@acc.org) [jaccimg@acc.org](mailto:jaccimg@acc.org) [jacchf@acc.org](mailto:jacchf@acc.org)

Complete the section below, type your name into the Type Name box and input the date. *By submitting this form, you attest to being an author on the paper.*

Type Name: John GF Cleland Date: 01/07/2015

Title and Company (if employer representative):

I have **no relationship with industry** to disclose.

I have **financial information** to disclose.

1. Type **financial information** to disclose: Research Grant
2. Type **financial information** to disclose: Speakers Fees
3. Type **financial information** to disclose: Advisory Boards

local\_p\_id: 1340

time: 1435773880

ip address: 129.31.49.102
